# Supplementary material for: IgM autoantibodies recognizing ACE2 are associated with severe COVID-19
Source: PubMed Central journal article supplement — medRxiv. 2020 Oct 15:2020.10.13.20211664. Preprint. [Version 1] doi: 10.1101/2020.10.13.20211664 (PMC7574257; doi:10.1101/2020.10.13.20211664), 2020-10-15
Supplement: NIHPP2020.10.13.20211664-supplement-1.pdf [file NIHPP2020.10.13.20211664-supplement-1.pdf]

## Supplemental Table 1. Demographics of the study population

|                                 |                  | N   |
|---------------------------------|------------------|-----|
| Total                           |                  | 118 |
| <b>Demographics</b>             |                  |     |
| Age (years)                     | 60 (50-71)       |     |
| Male gender                     | 56%              | 66  |
| White race/ethnicity            | 26%              | 31  |
| Black race/ethnicity            | 41%              | 48  |
| Hispanic race/ethnicity         | 23%              | 27  |
| Asian race/ethnicity            | 3%               | 3   |
| Other                           | 8%               | 9   |
| BMI (kg/m <sup>2</sup> )        | 30.2 (26.0-34.9) |     |
| <b>Comorbidities</b>            |                  |     |
| Diabetes mellitus               | 47%              | 56  |
| Hypertension                    | 64%              | 76  |
| Coronary artery disease         | 24%              | 28  |
| Congestive heart failure        | 23%              | 27  |
| Chronic lung disease            | 26%              | 31  |
| <b><u>Maximum WHO class</u></b> |                  |     |
| Minimal oxygen                  | 28%              | 34  |
| HFNC/NIPPV                      | 15%              | 18  |
| Mechanical ventilation          | 32%              | 38  |
| Dead                            | 24%              | 28  |

Continuous variables are median +/- interquartile range

Categorical variables are percentages

# SUPPL FIG 1

## A. Anti-ACE2 IgM antibodies in COVID cohorts

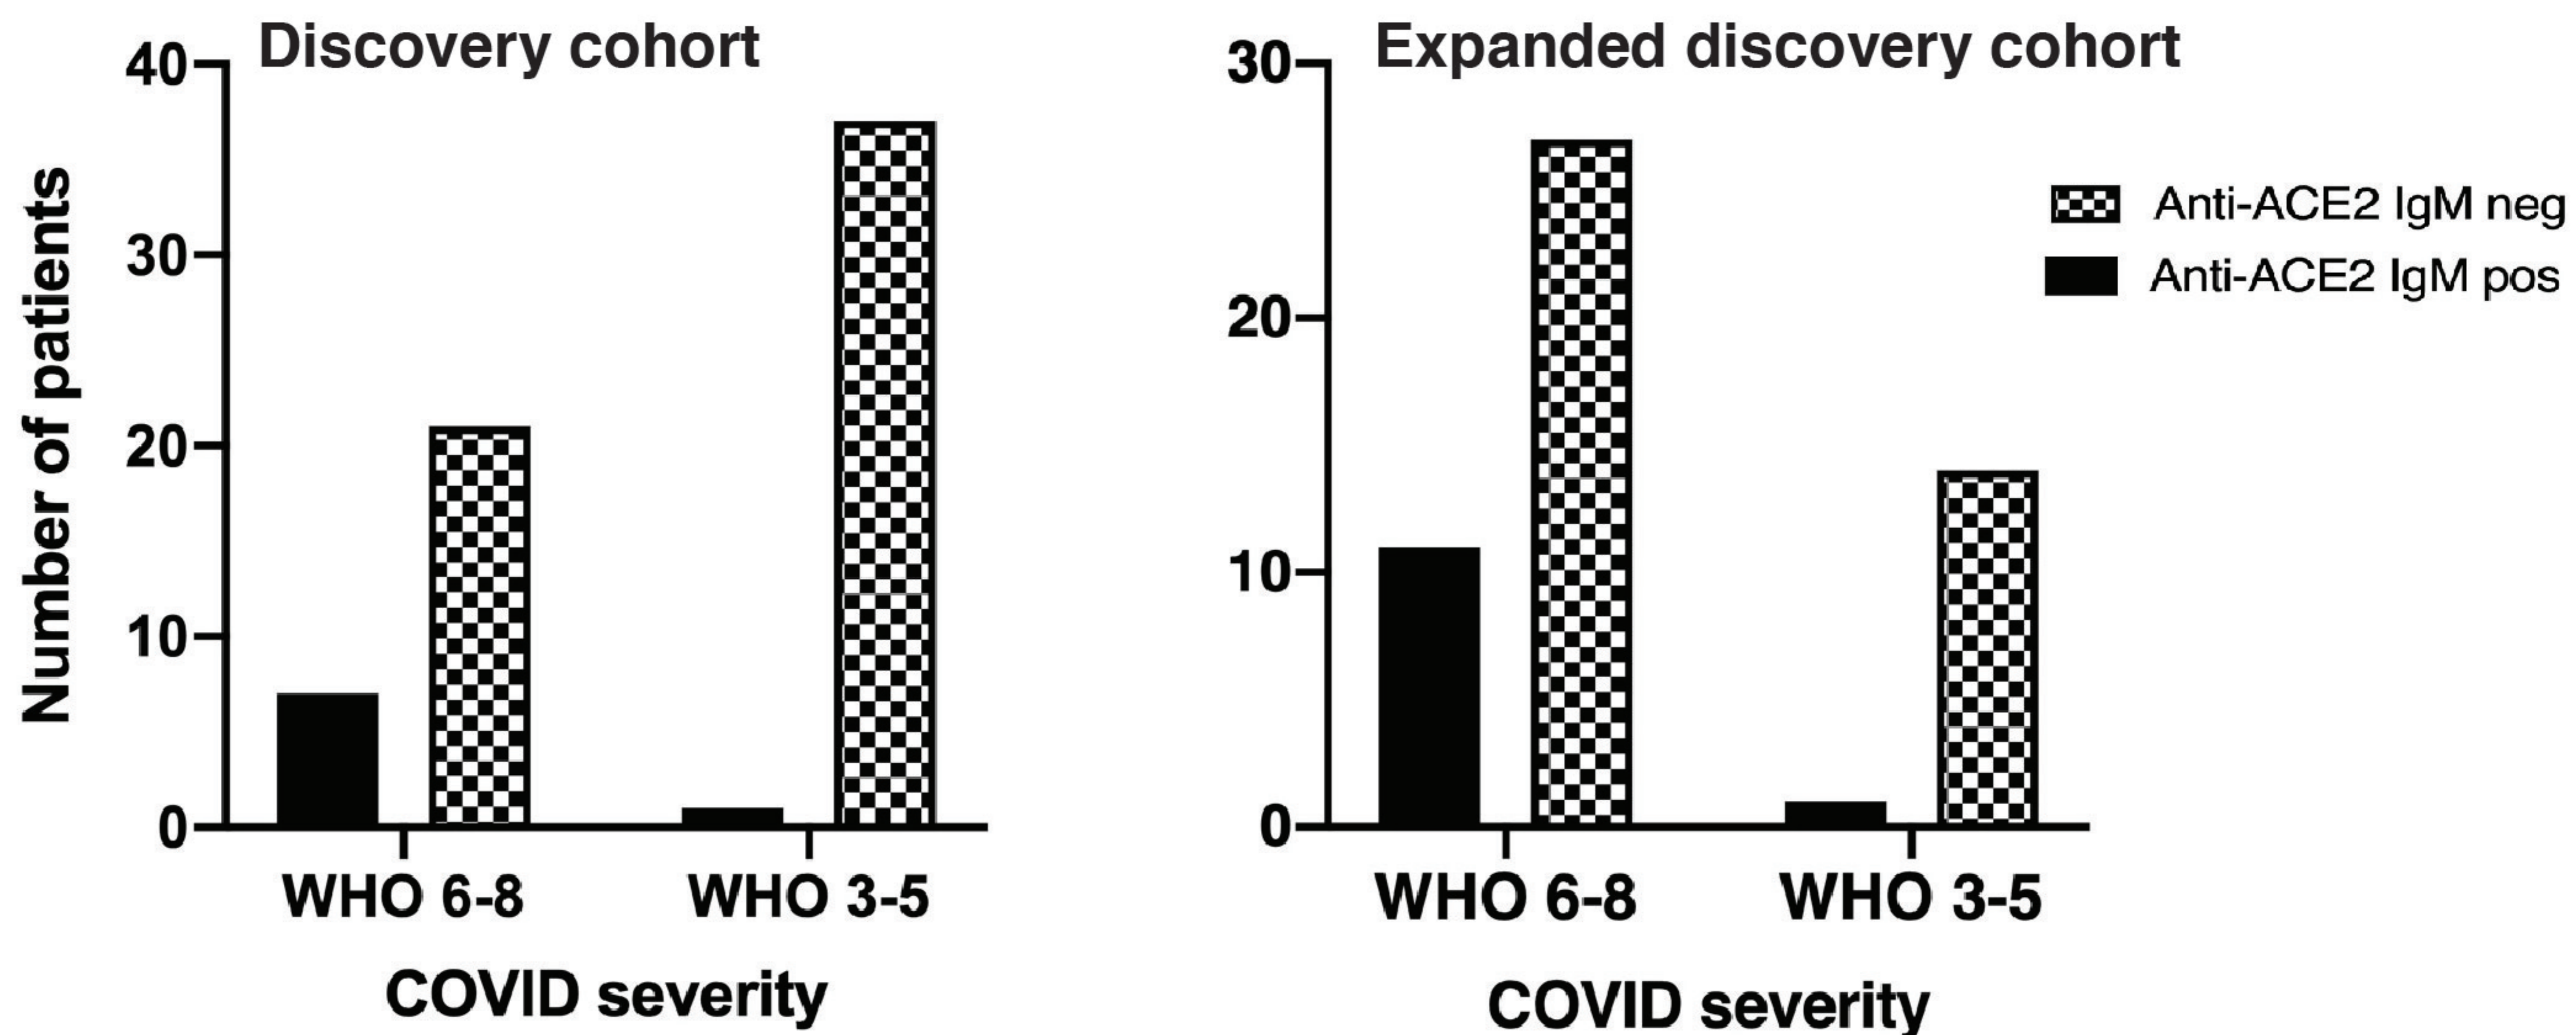

## B. AUC plots for anti-ACE2 IgM antibodies

medRxiv preprint doi: <https://doi.org/10.1101/2020.10.13.20211664>; this version posted October 15, 2020. The copyright holder for this preprint (which was not certified by peer review) is the author/funder, who has granted medRxiv a license to display the preprint in perpetuity. It is made available under a CC-BY-NC-ND 4.0 International license.

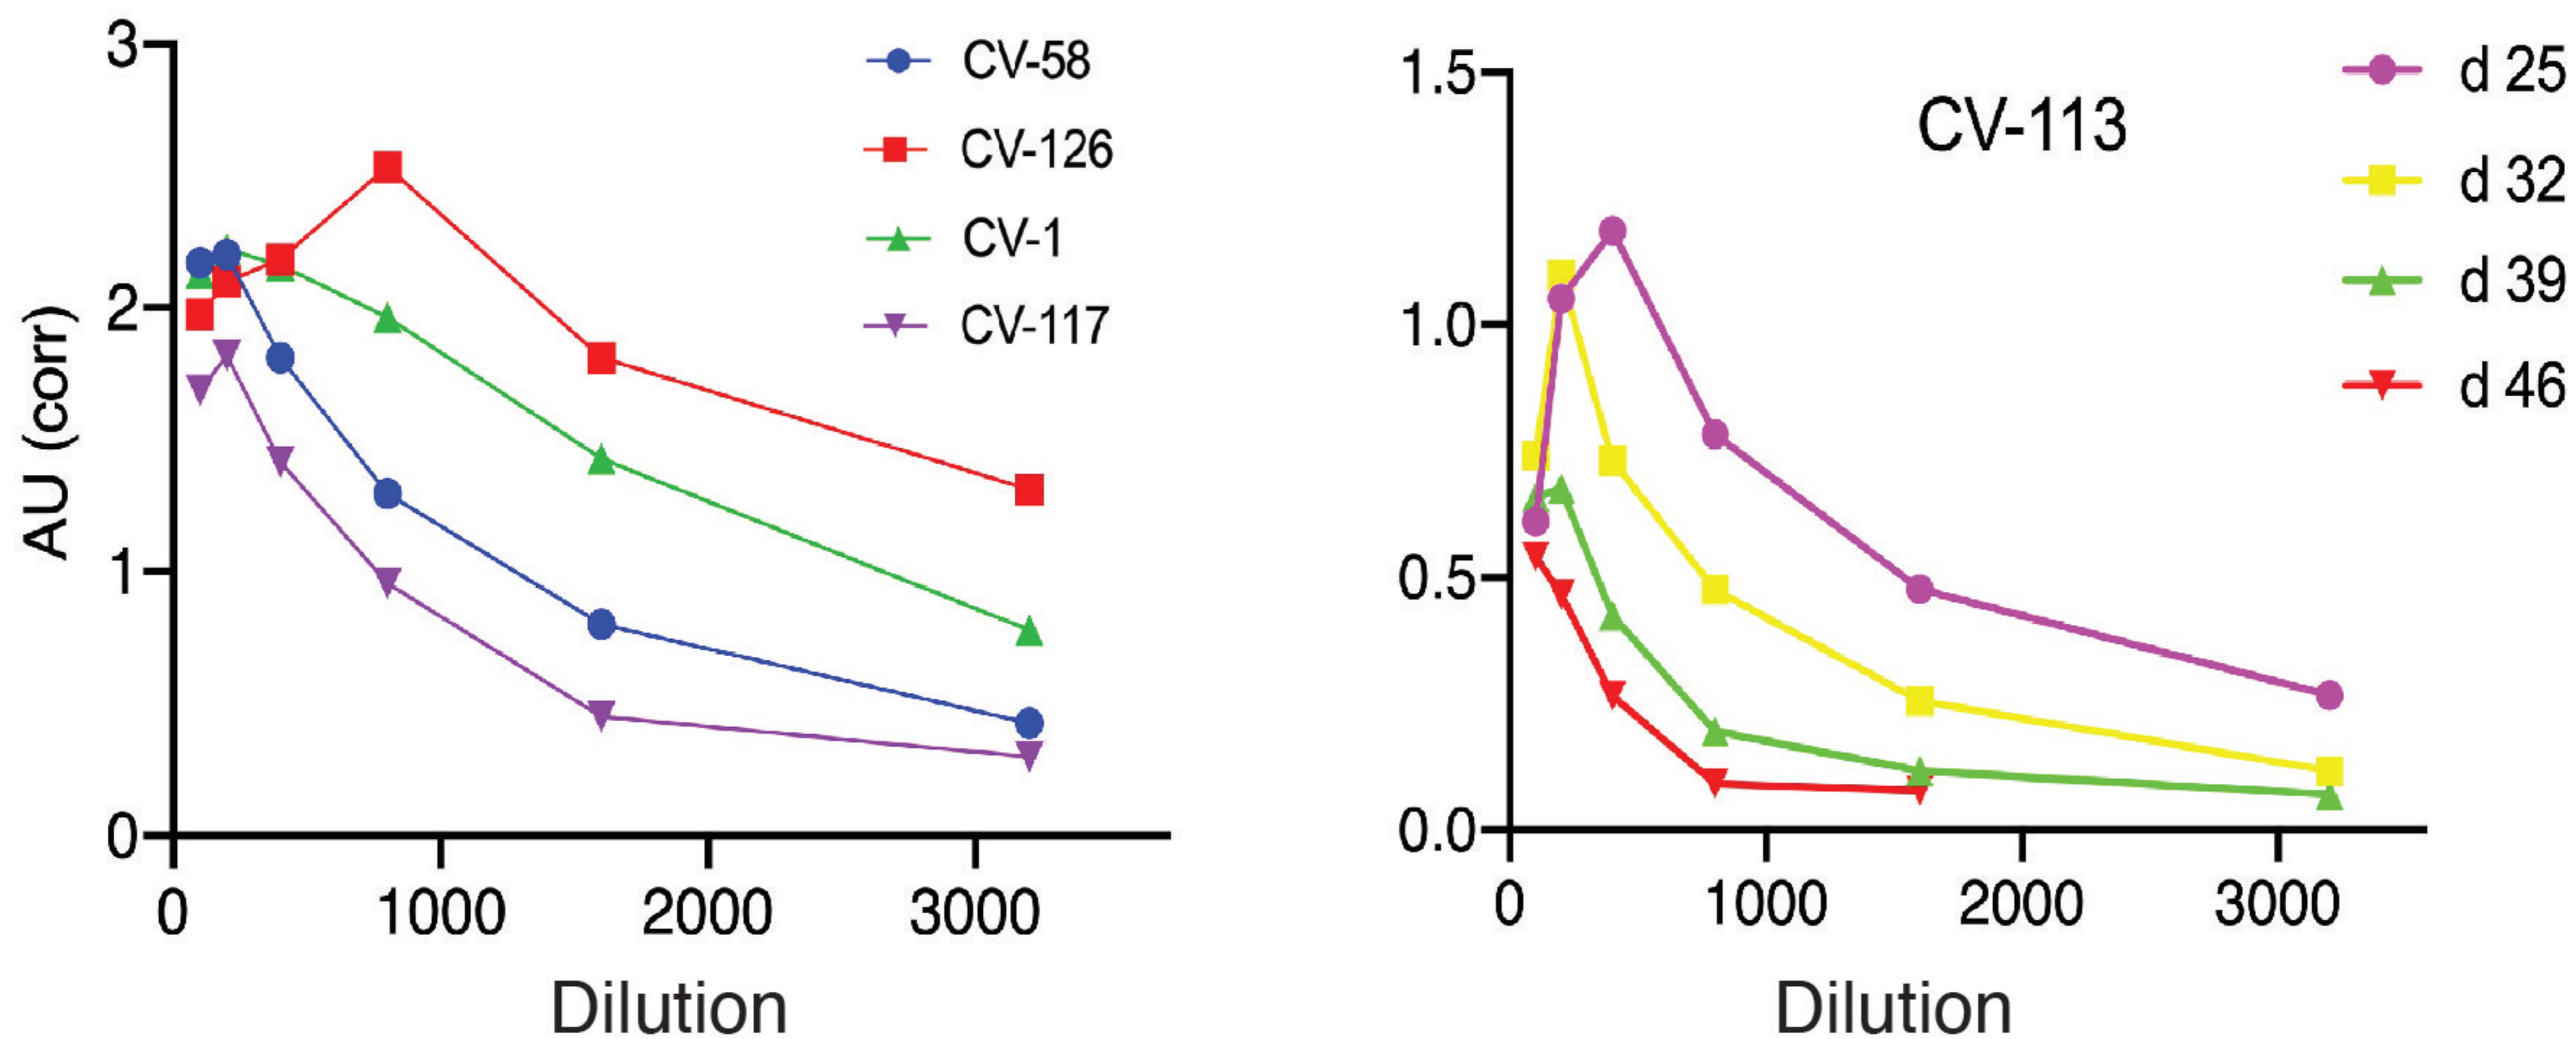

# SUPPL FIGURE 2

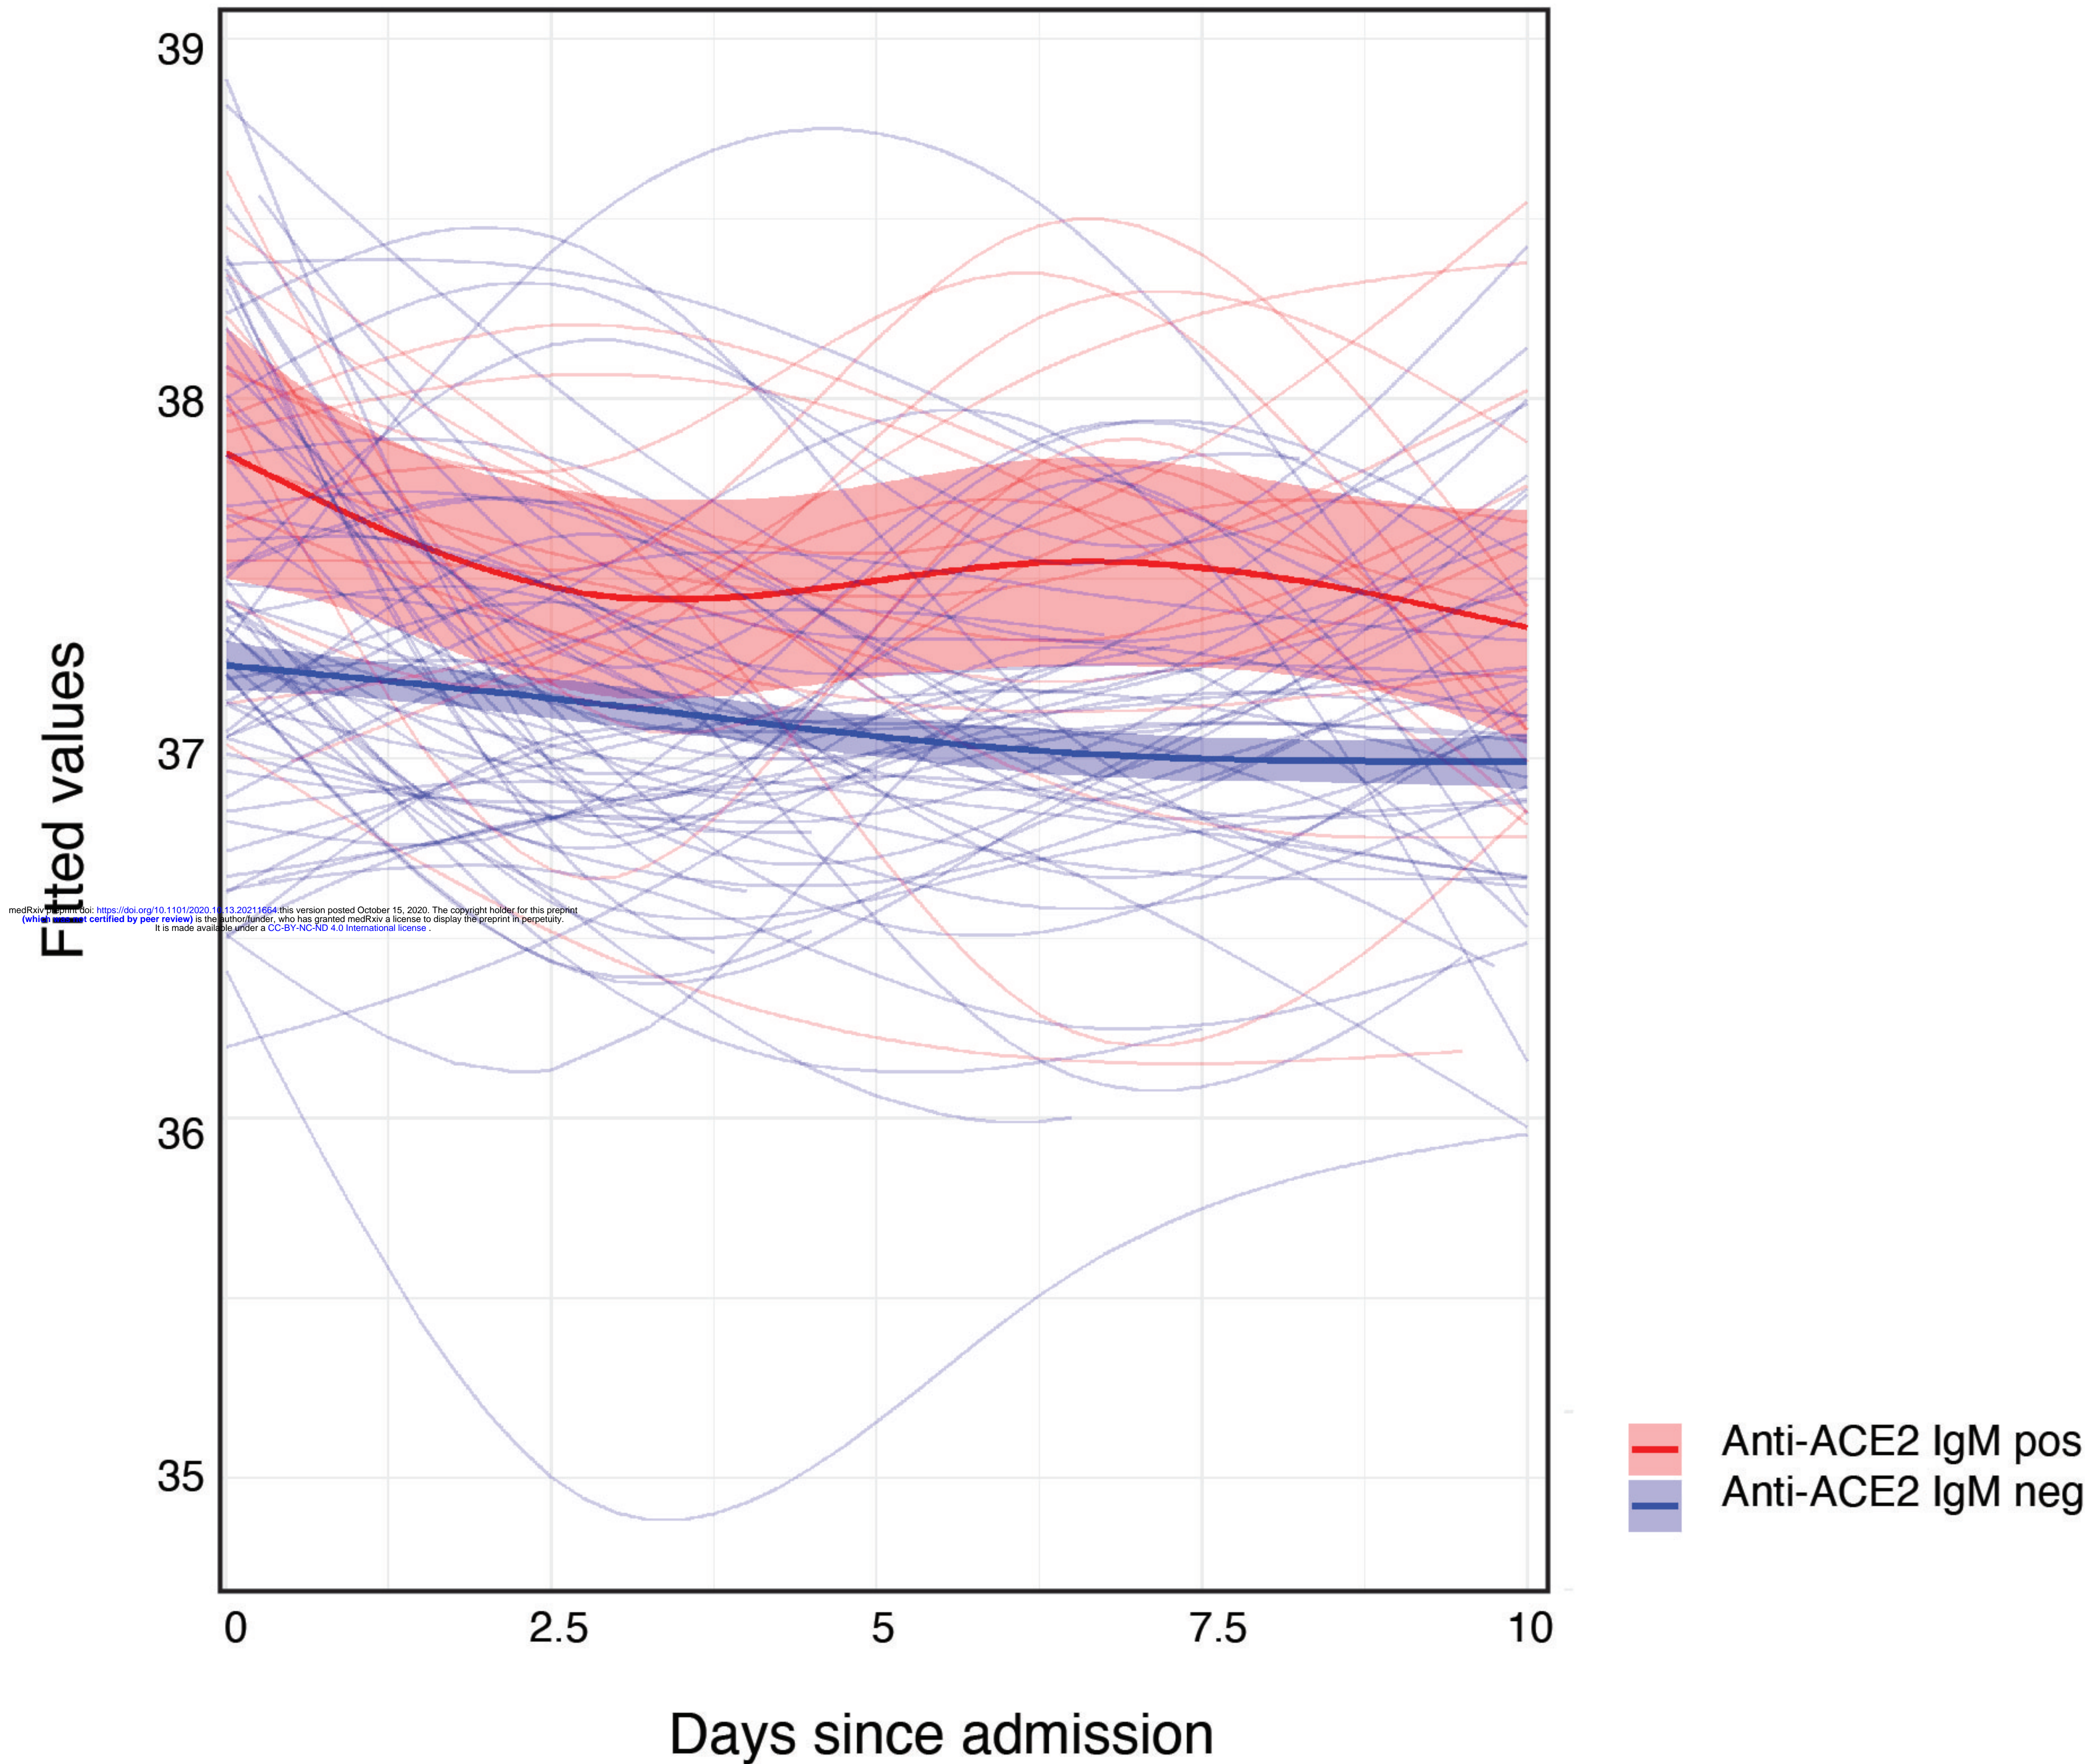

# Suppl Figure 3

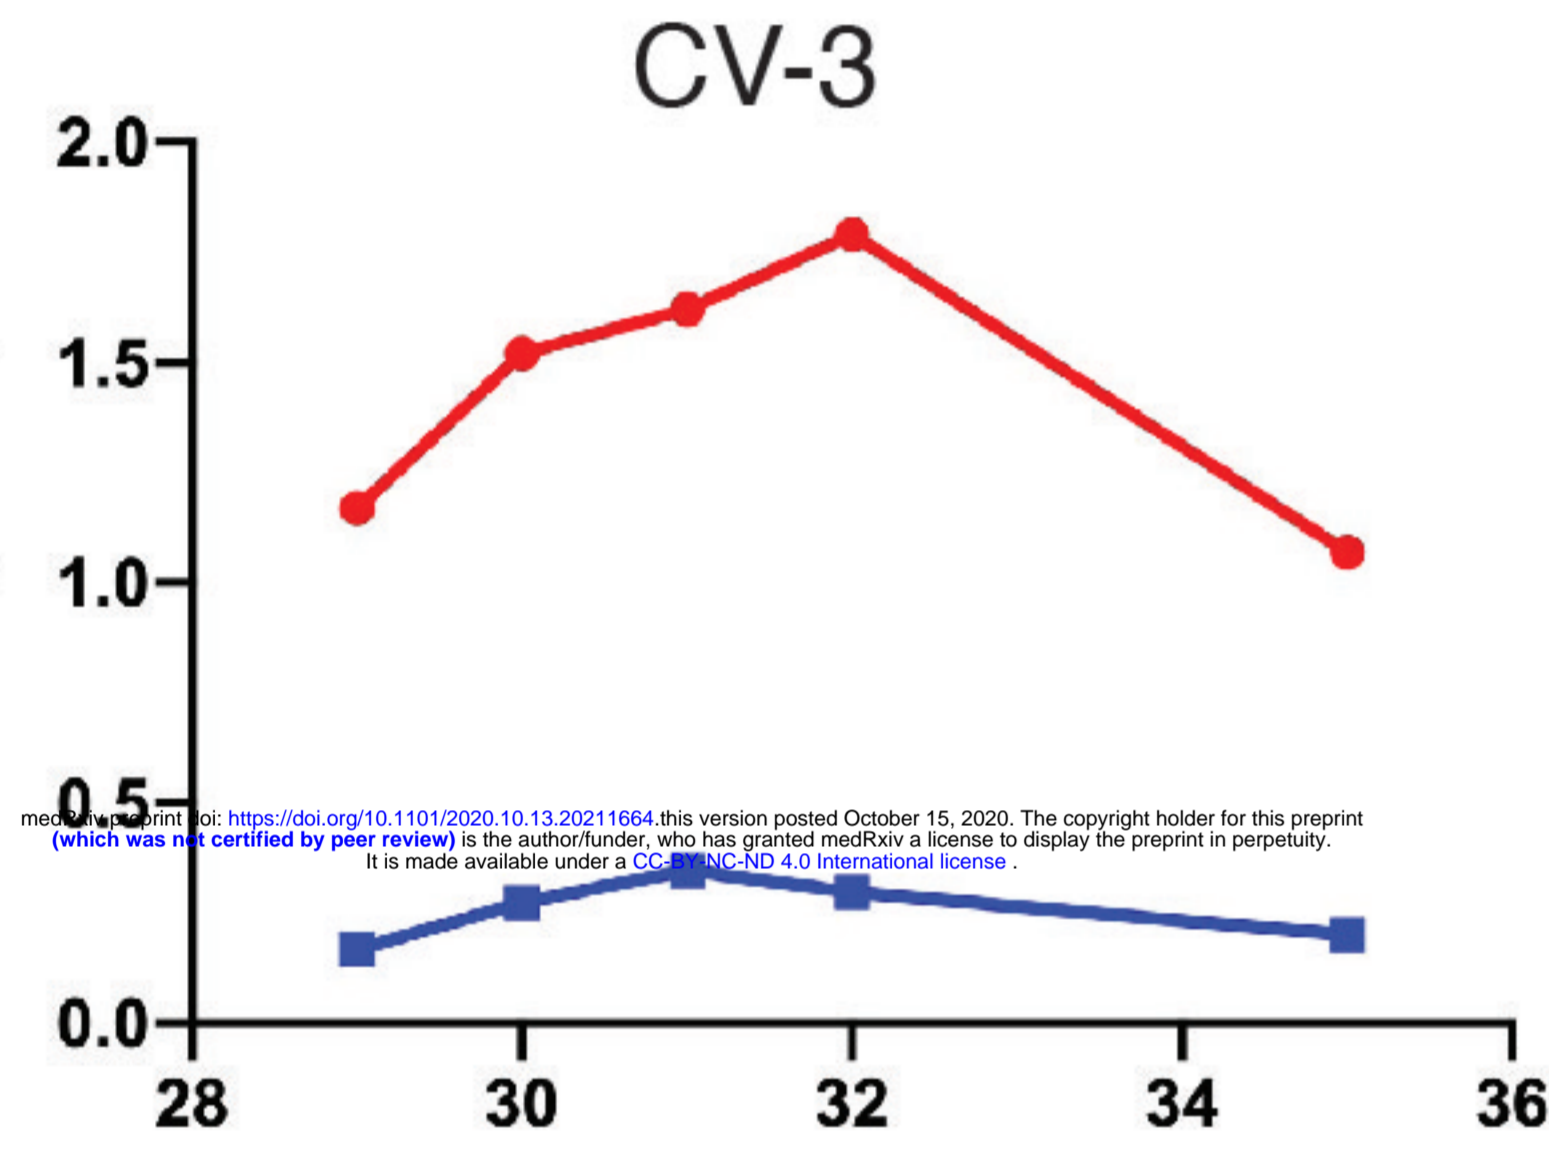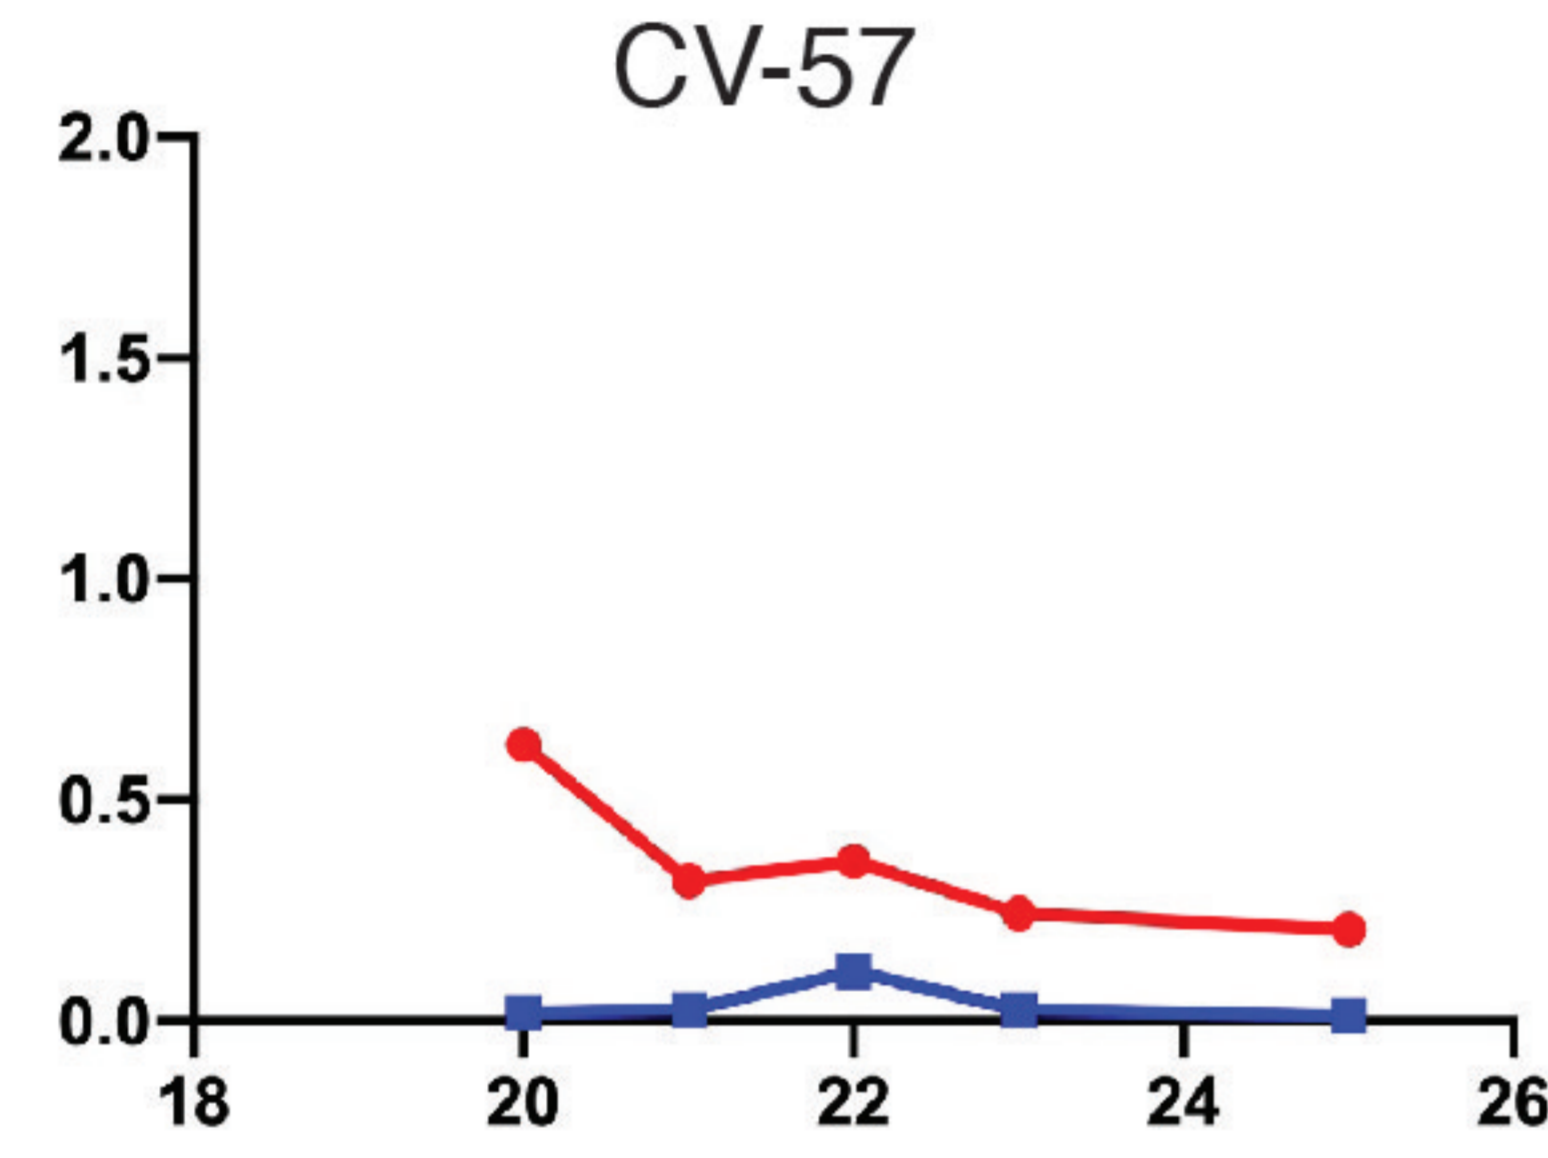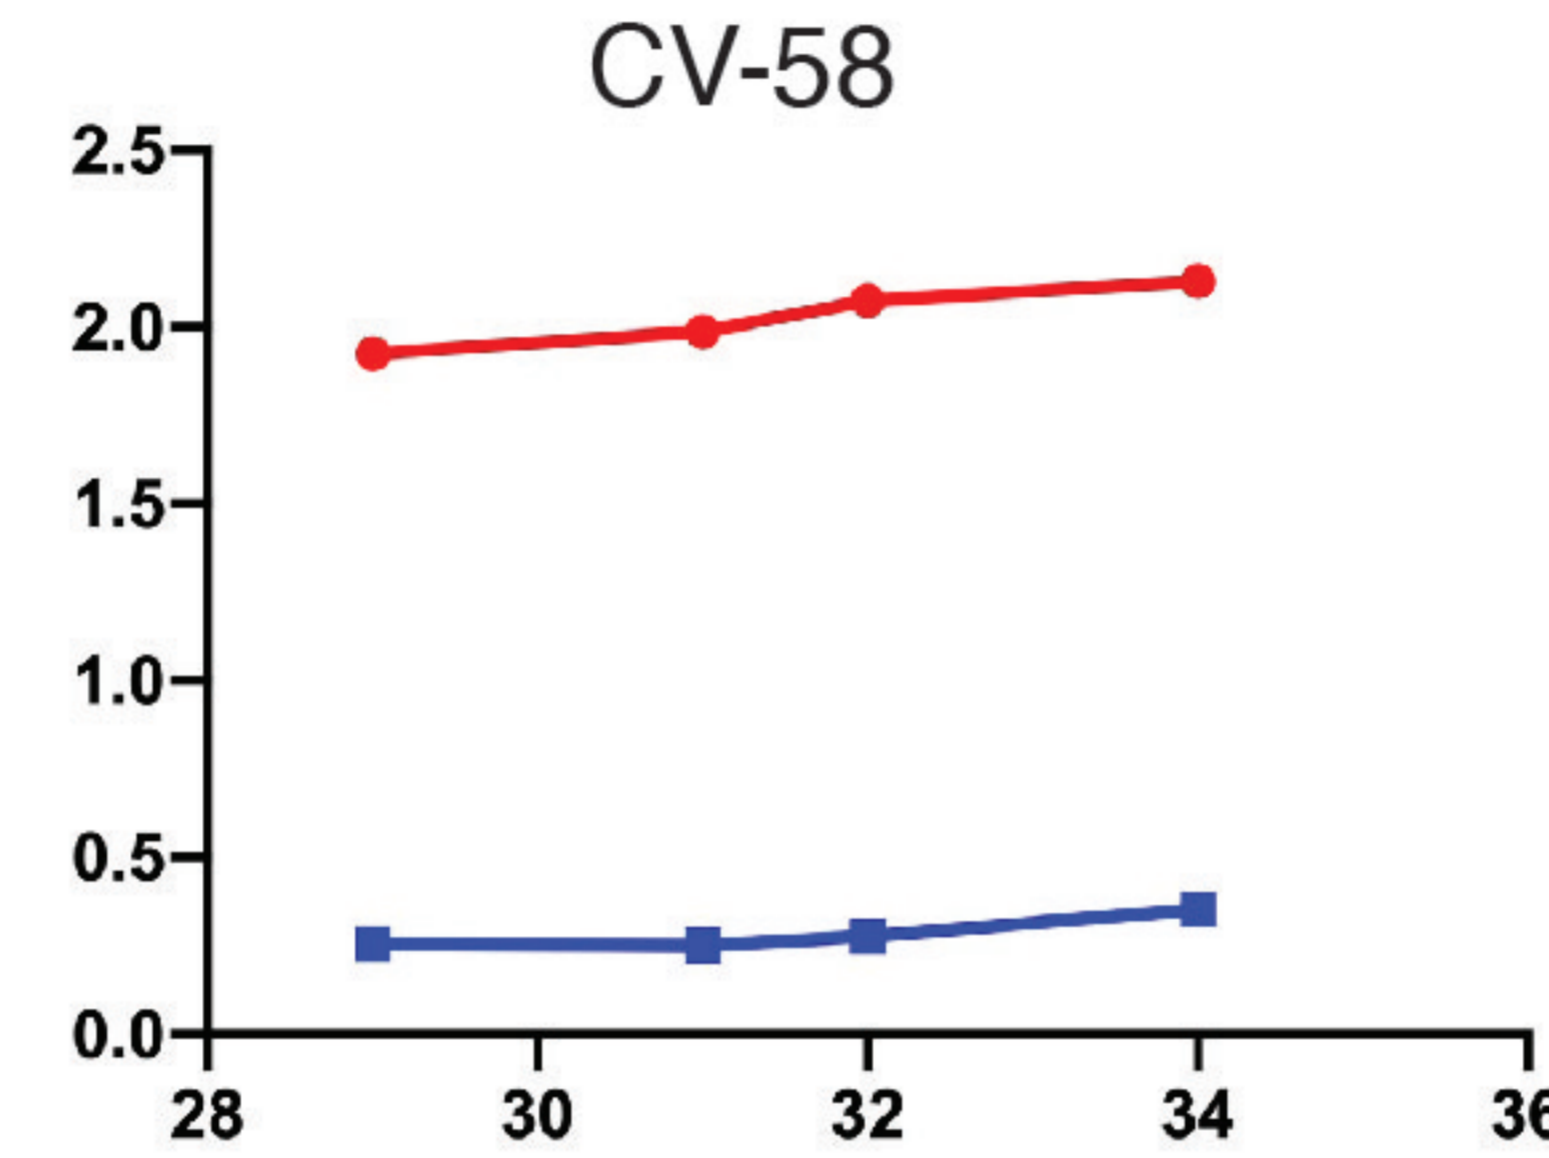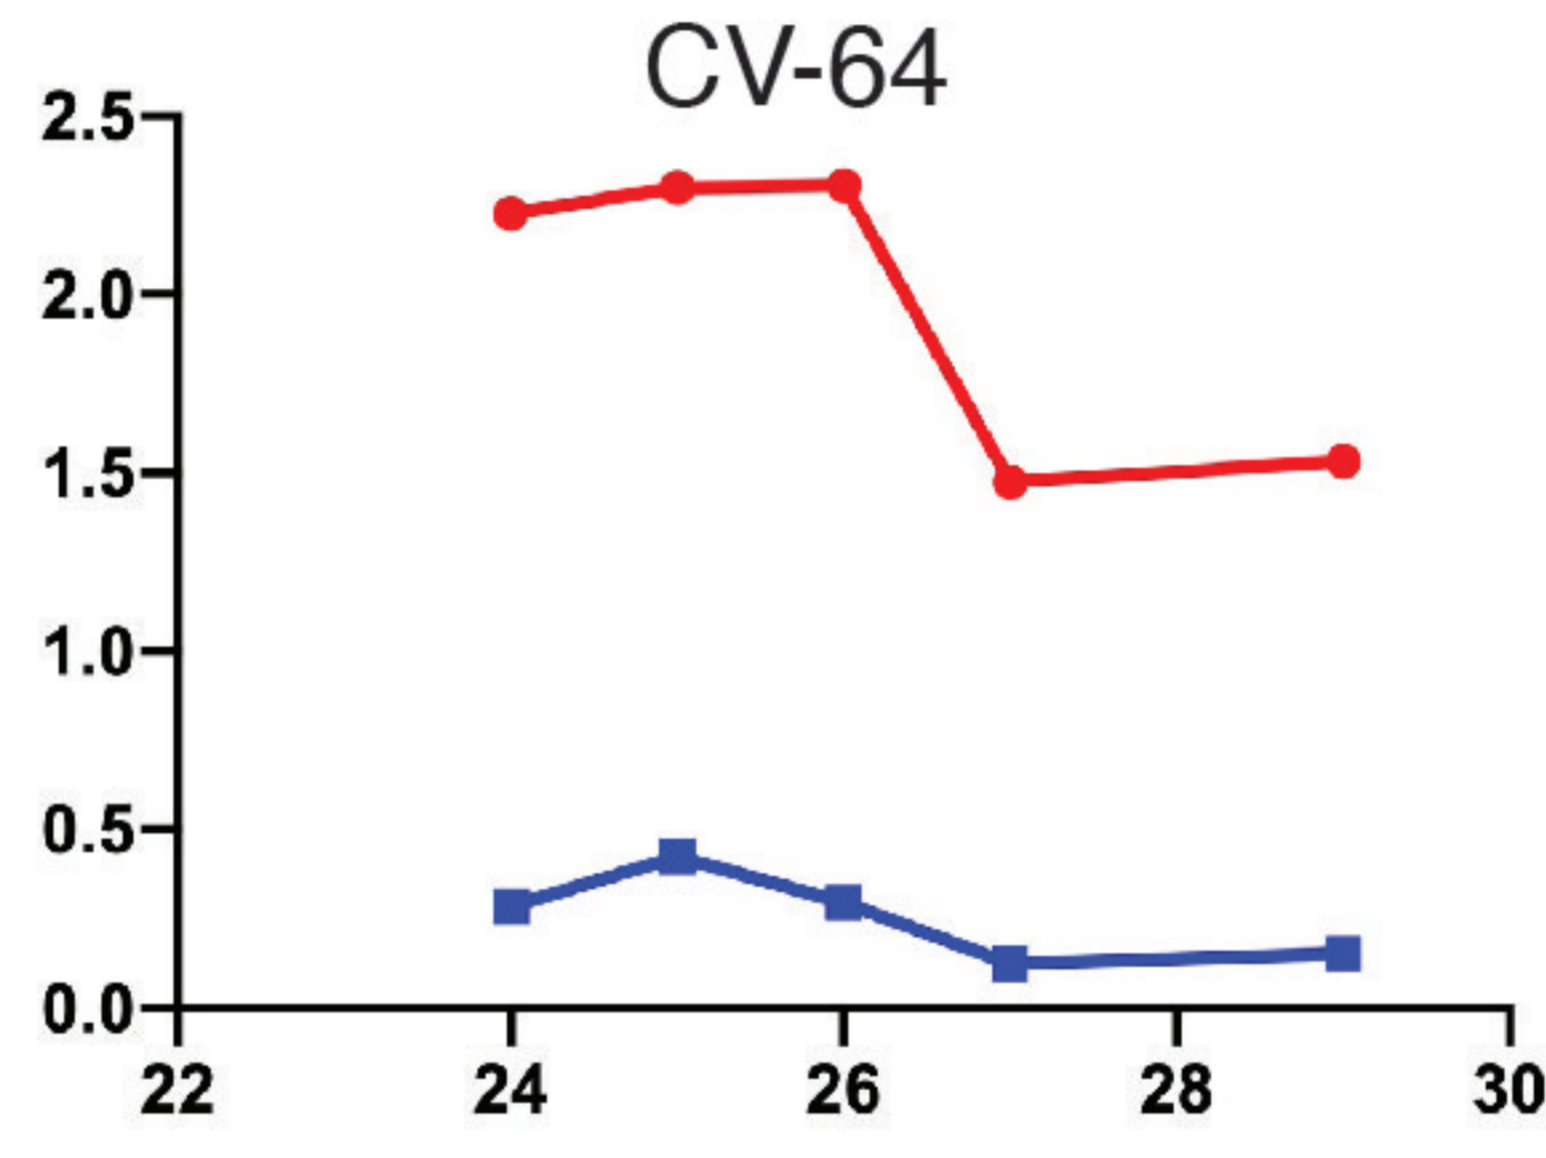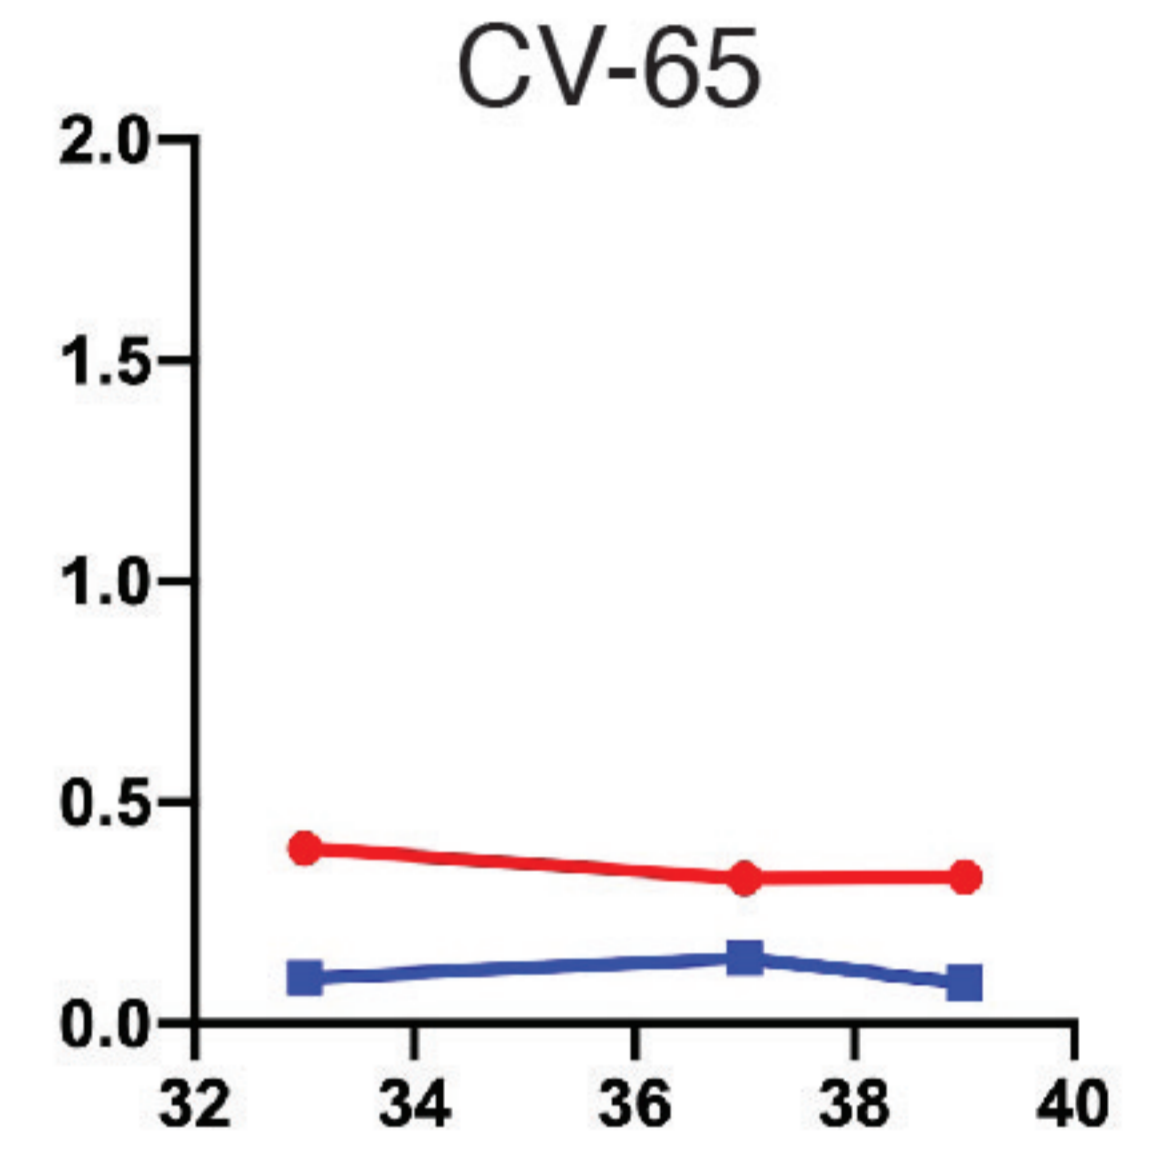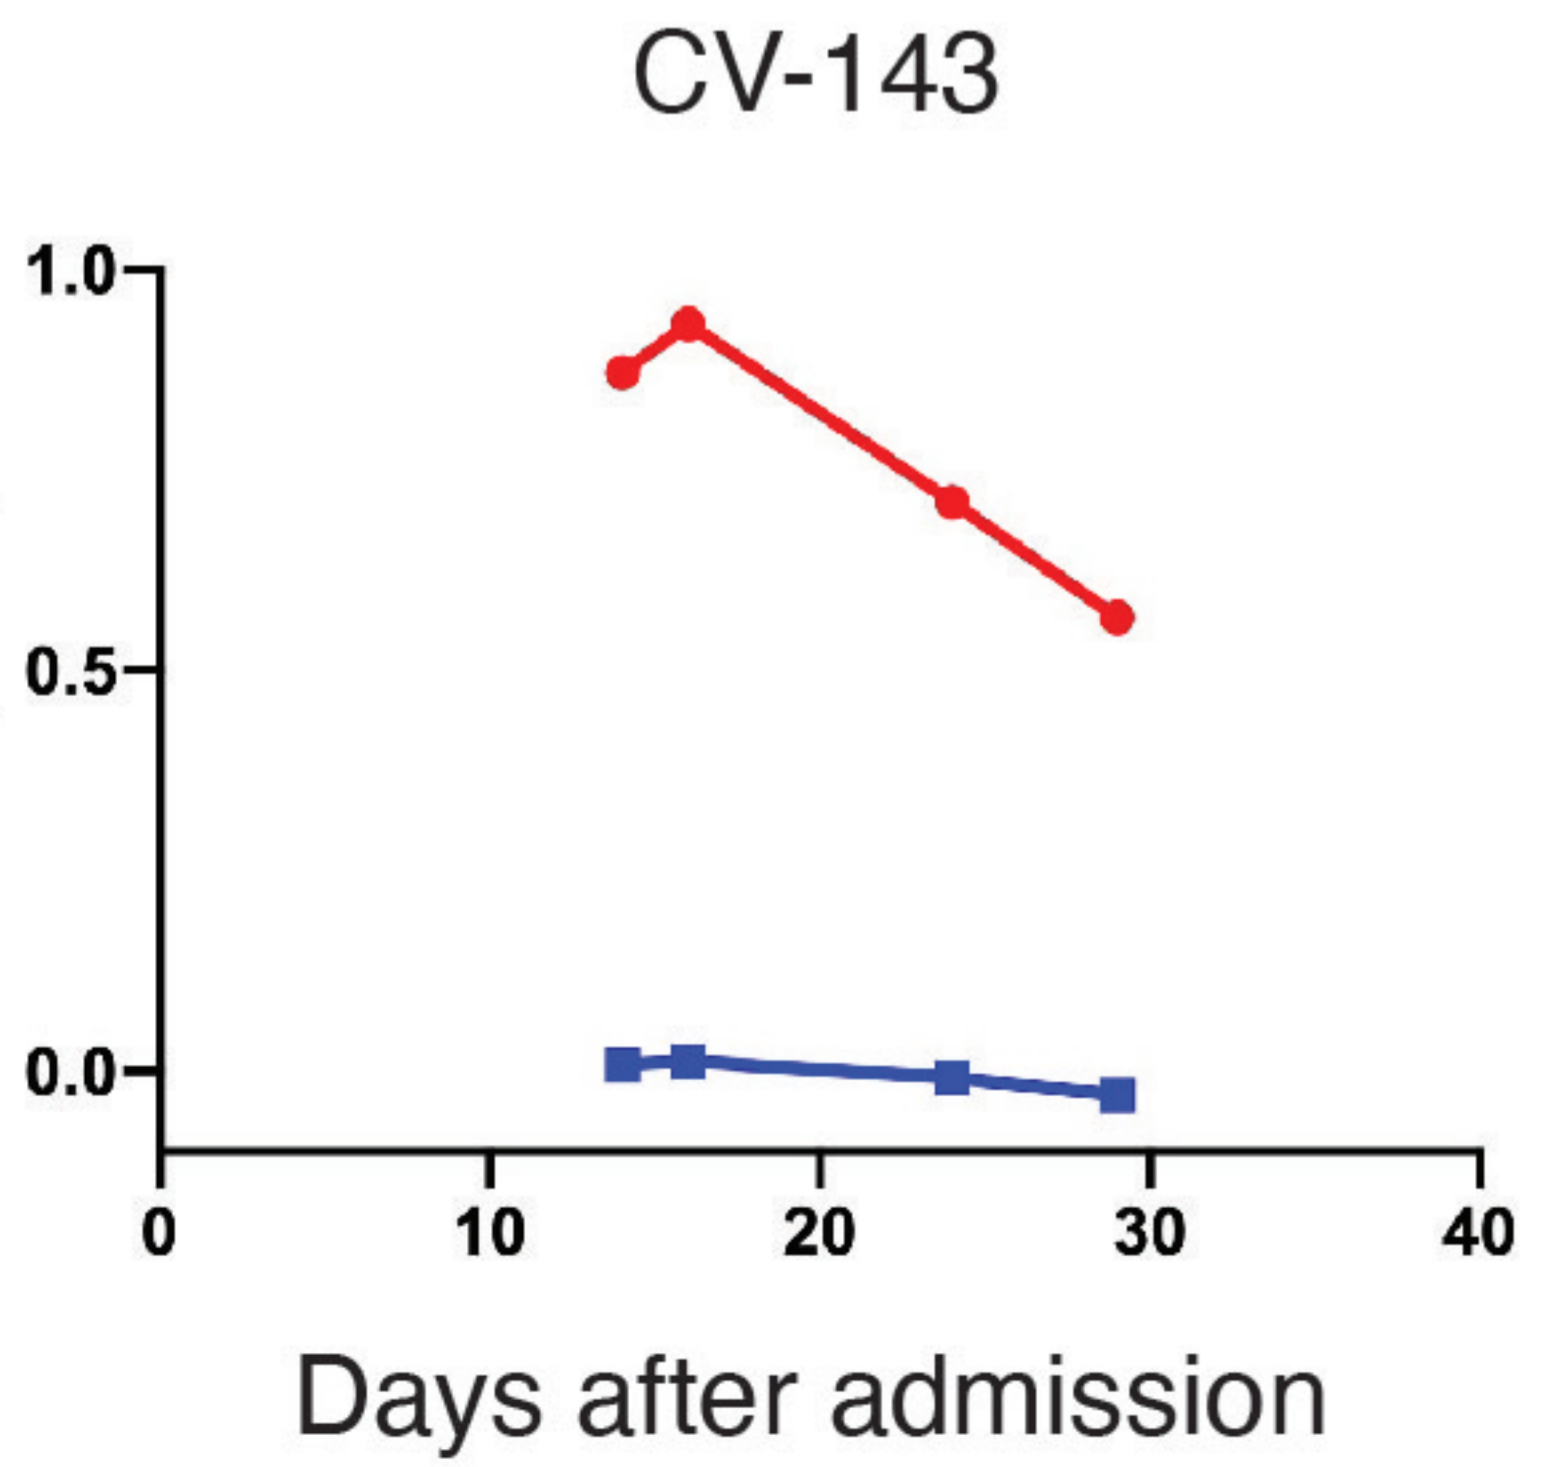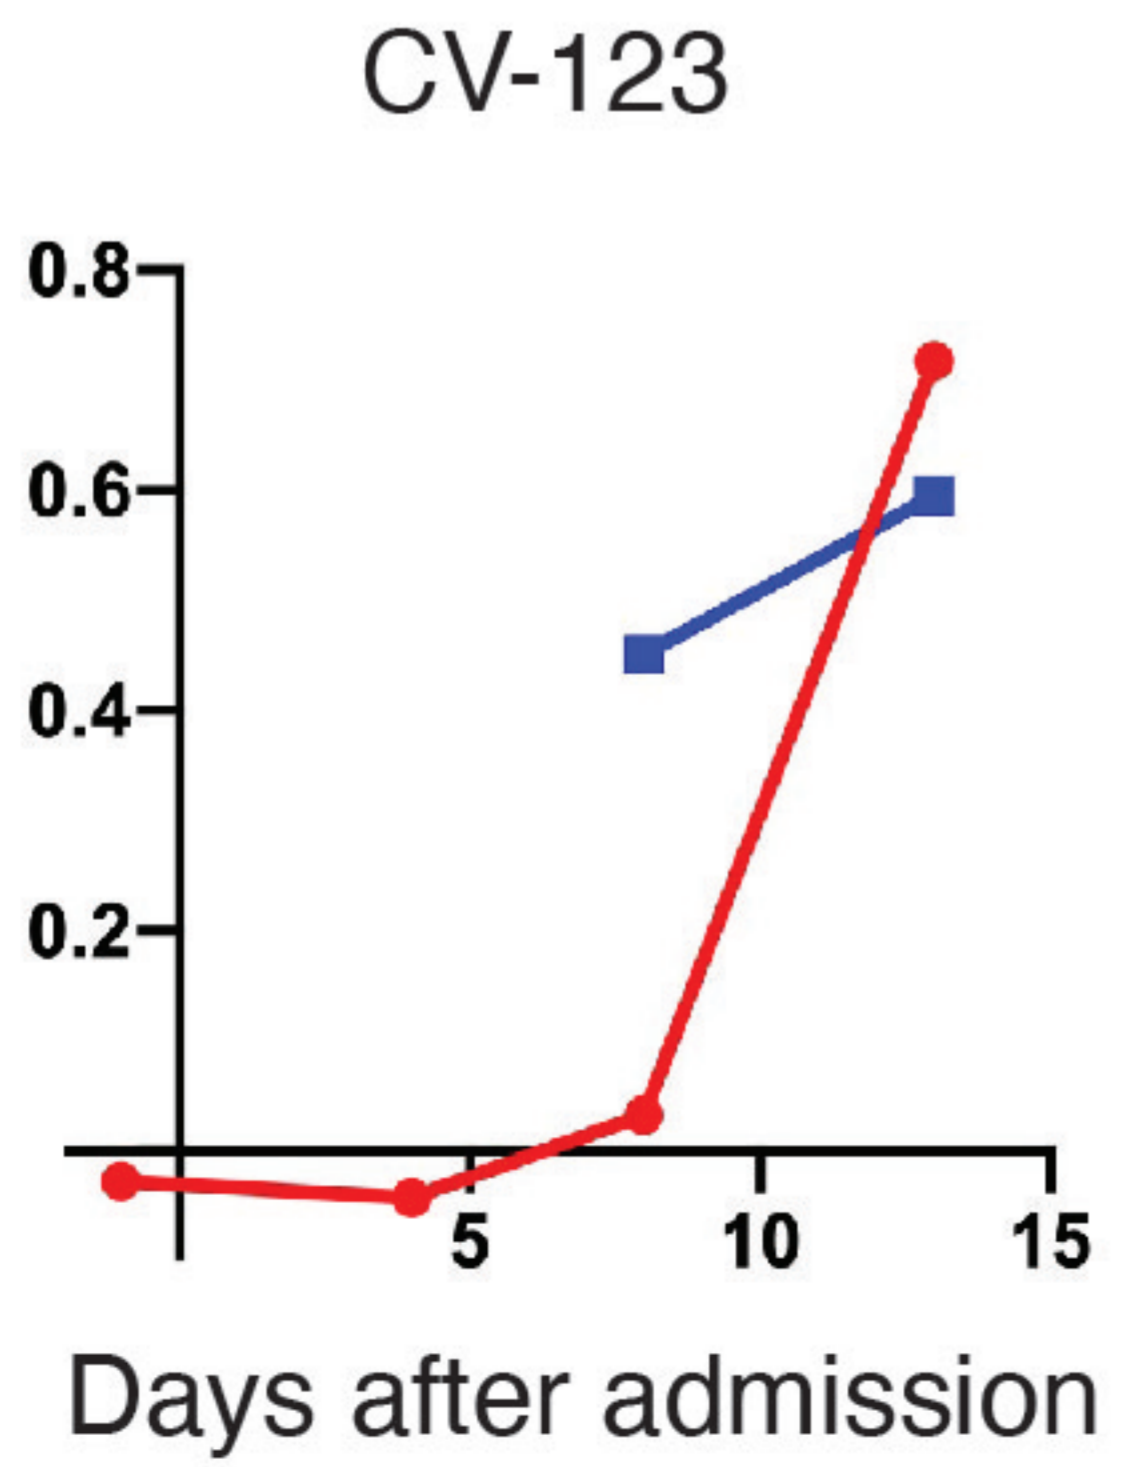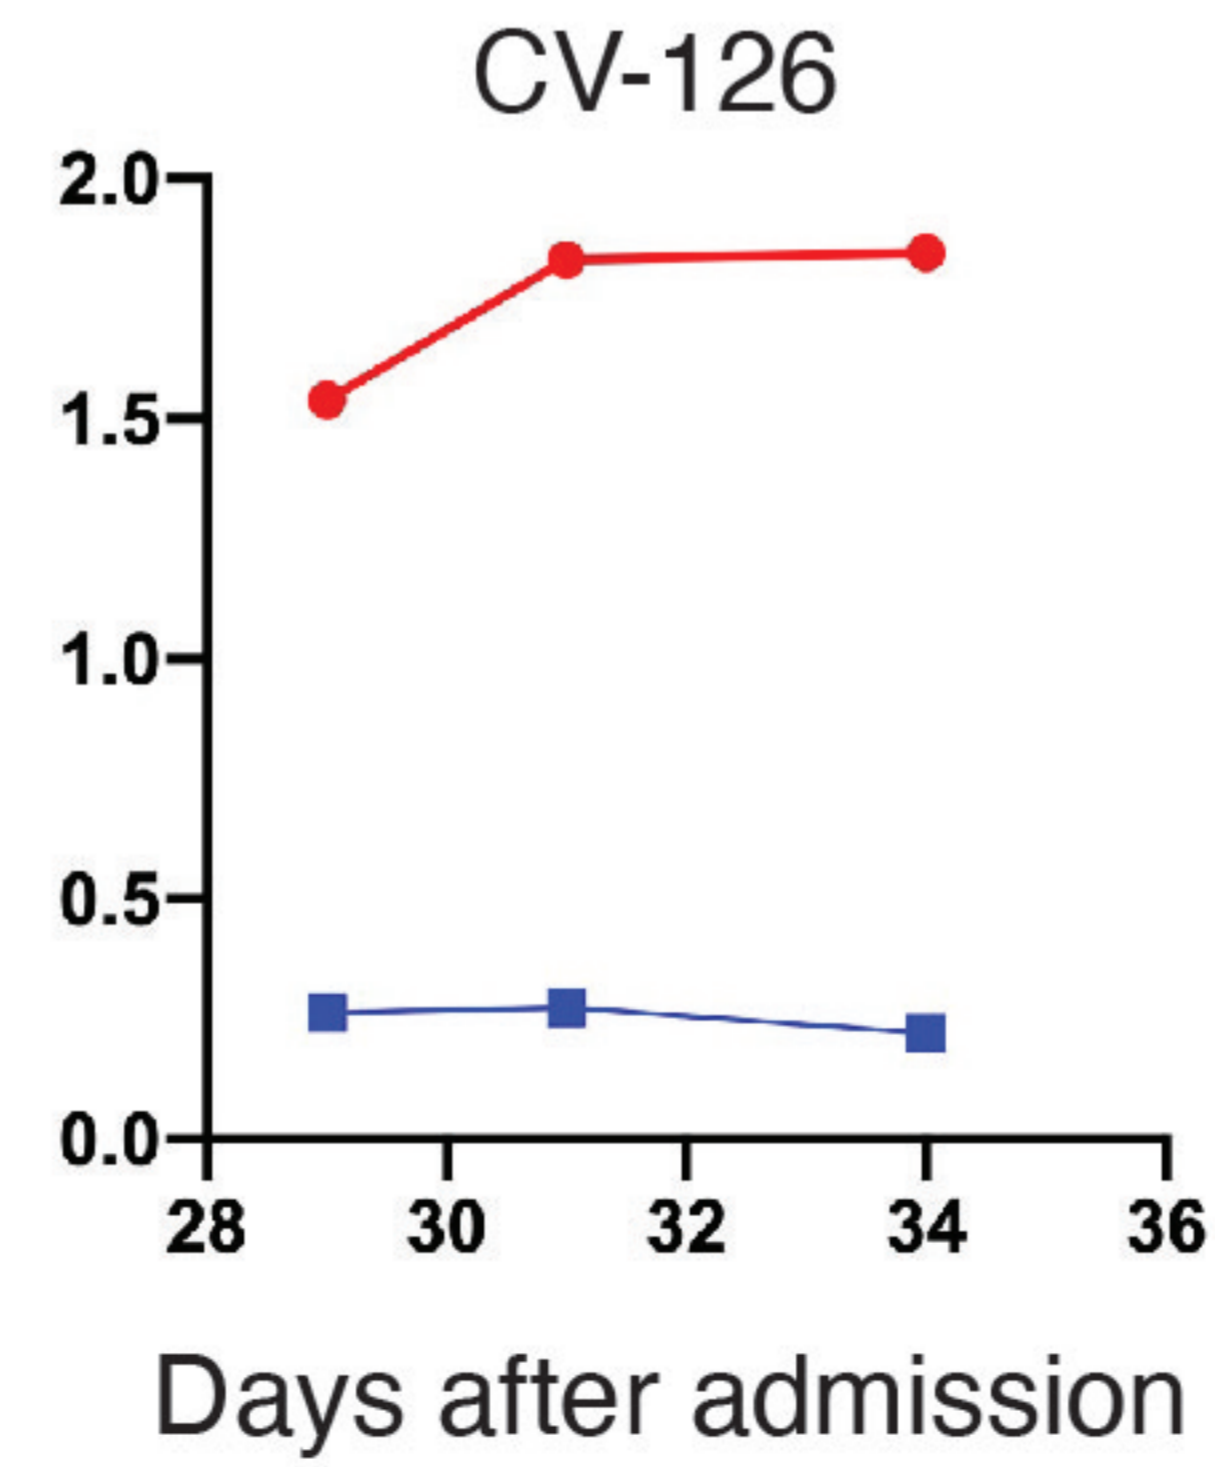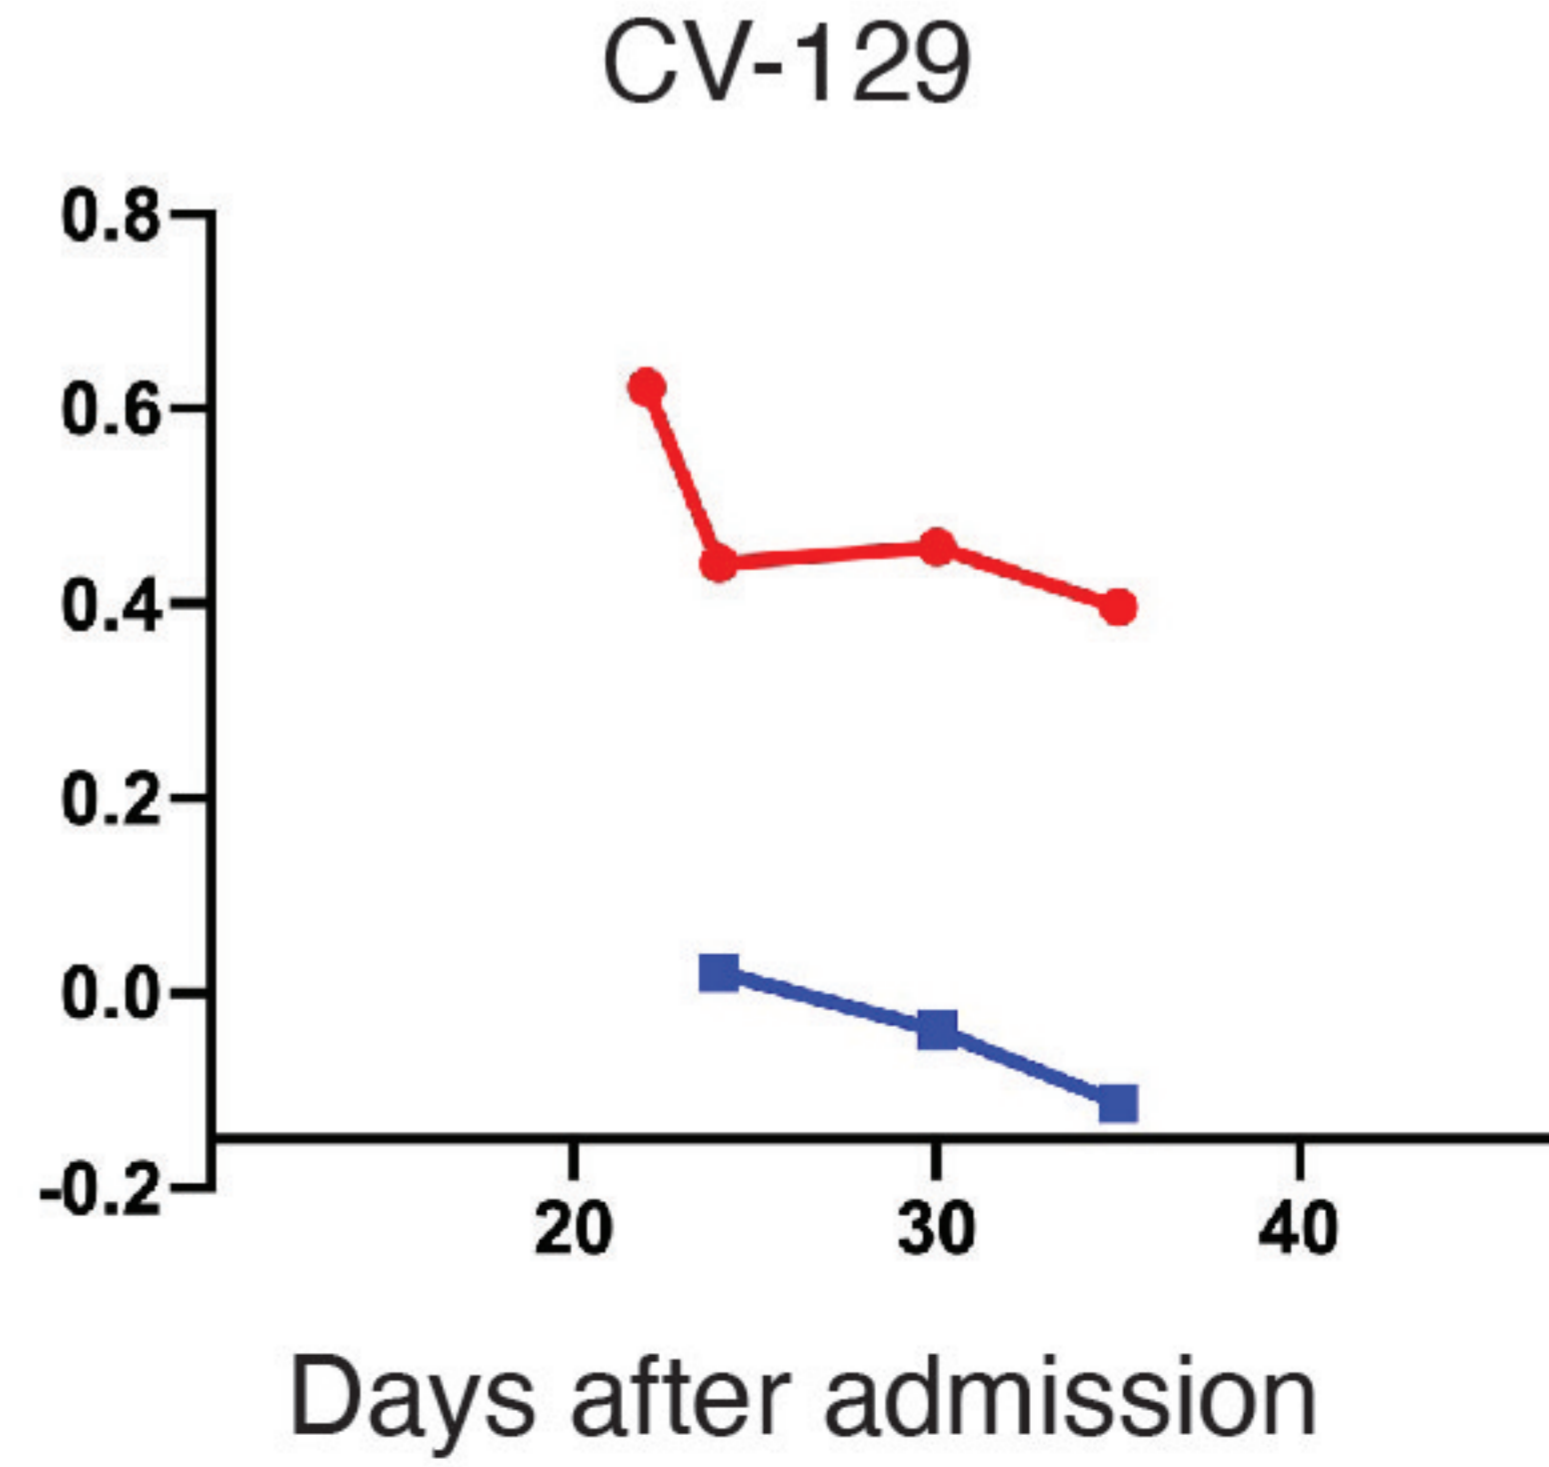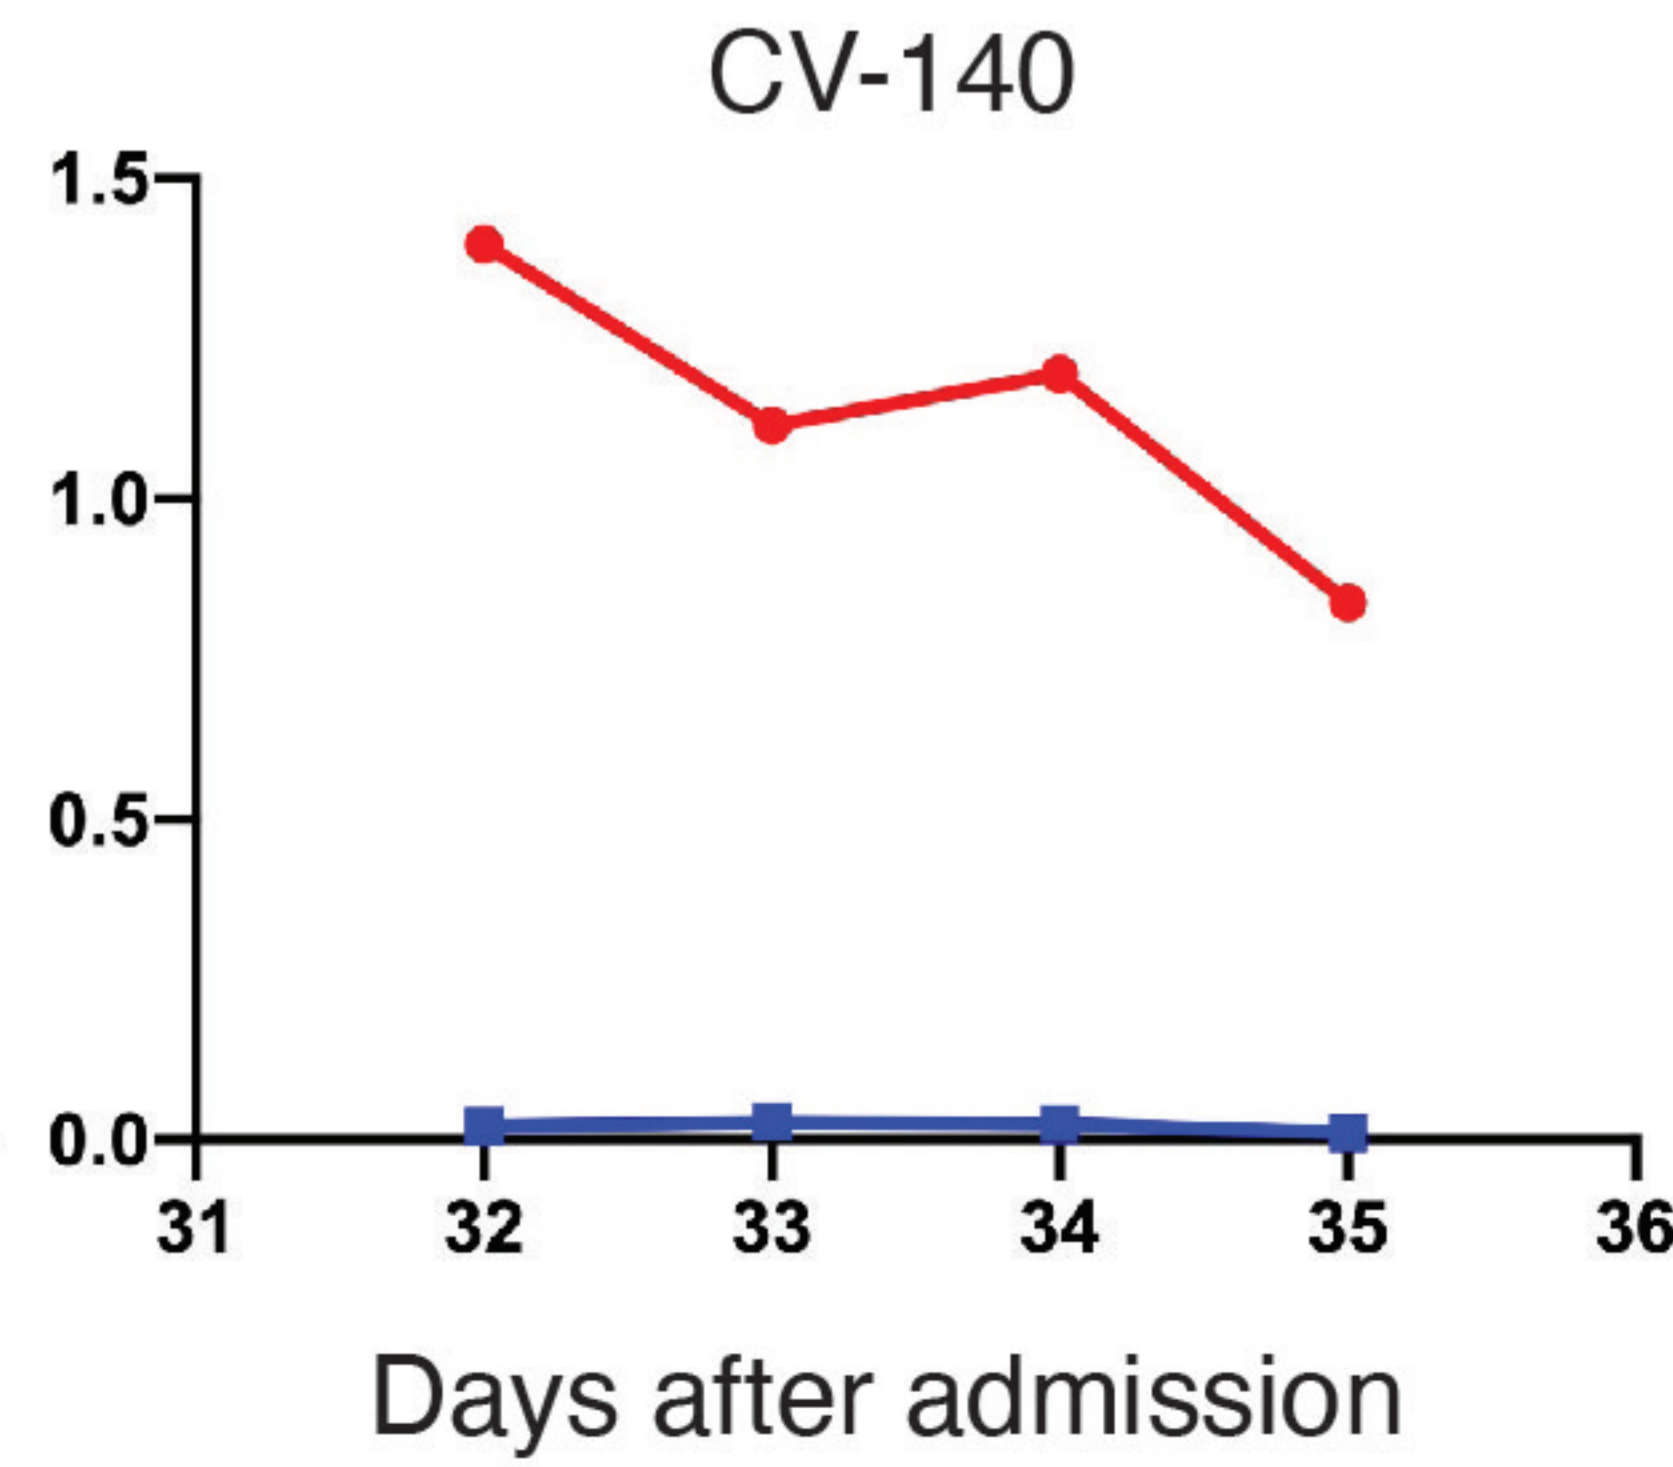

# SUPPL FIGURE 4

## A. SARS-CoV2 IgG spike ELISA

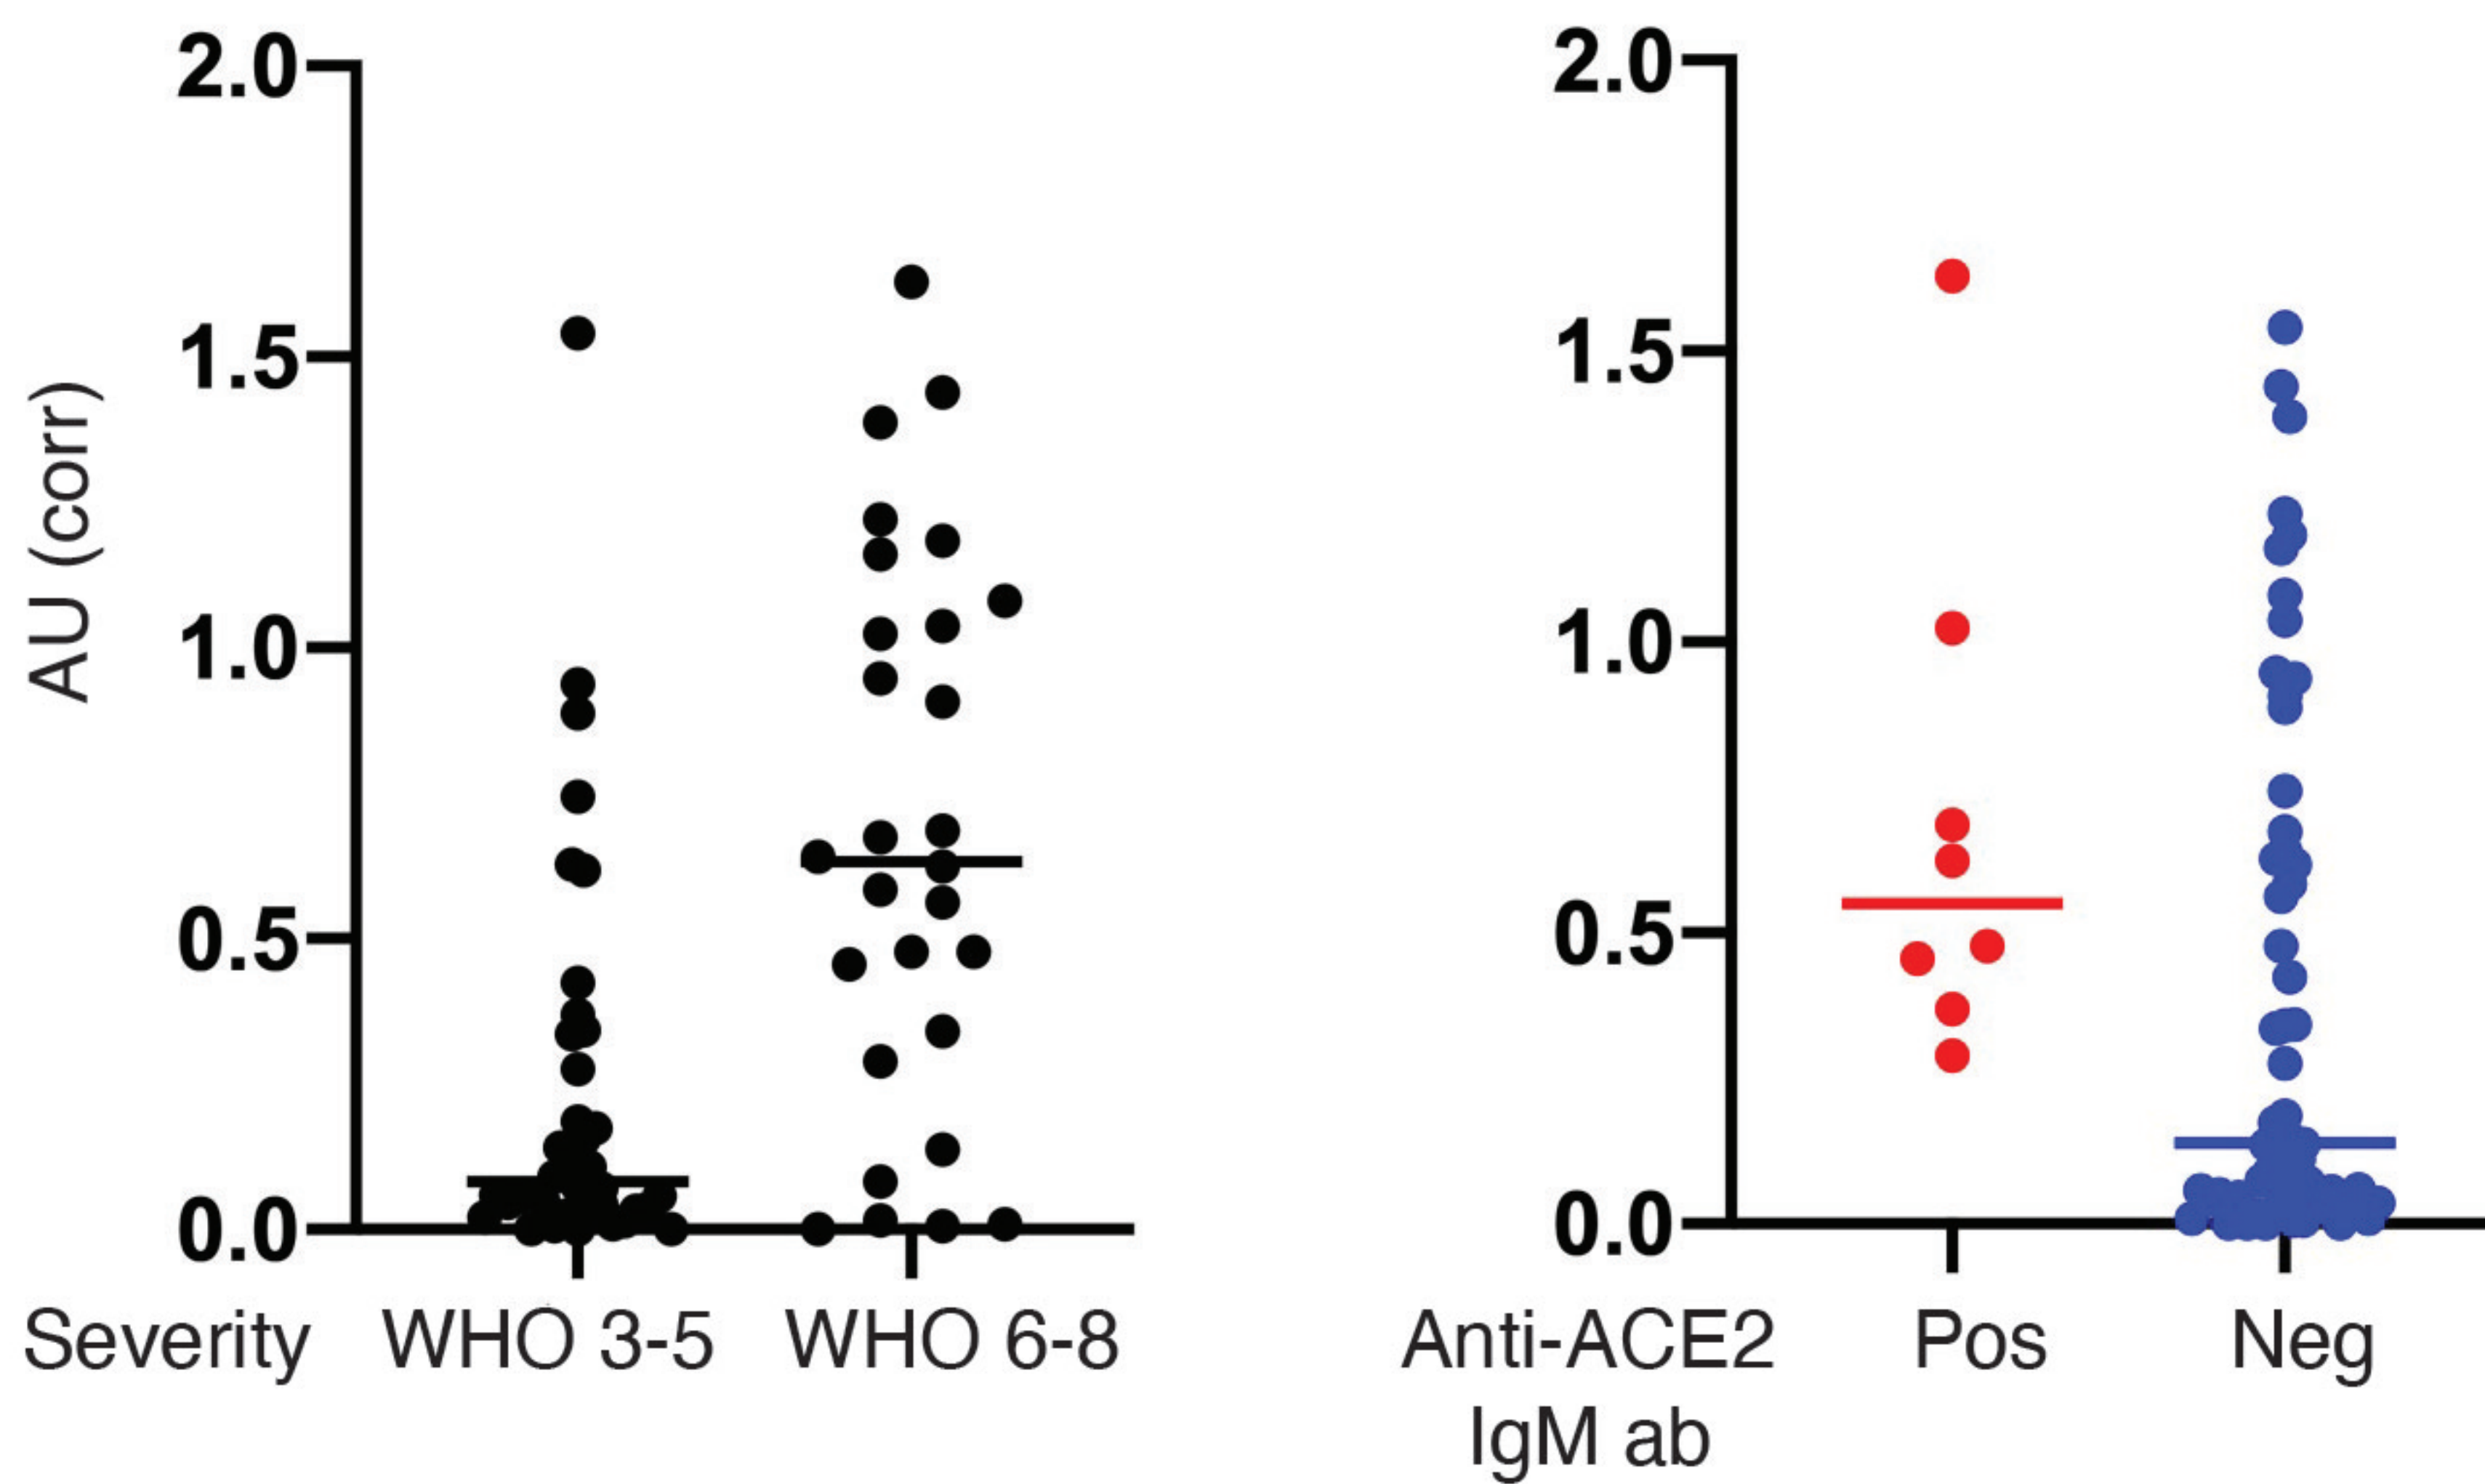

## B. SARS-CoV2 IgG antibodies - CoronaChek point of care assay

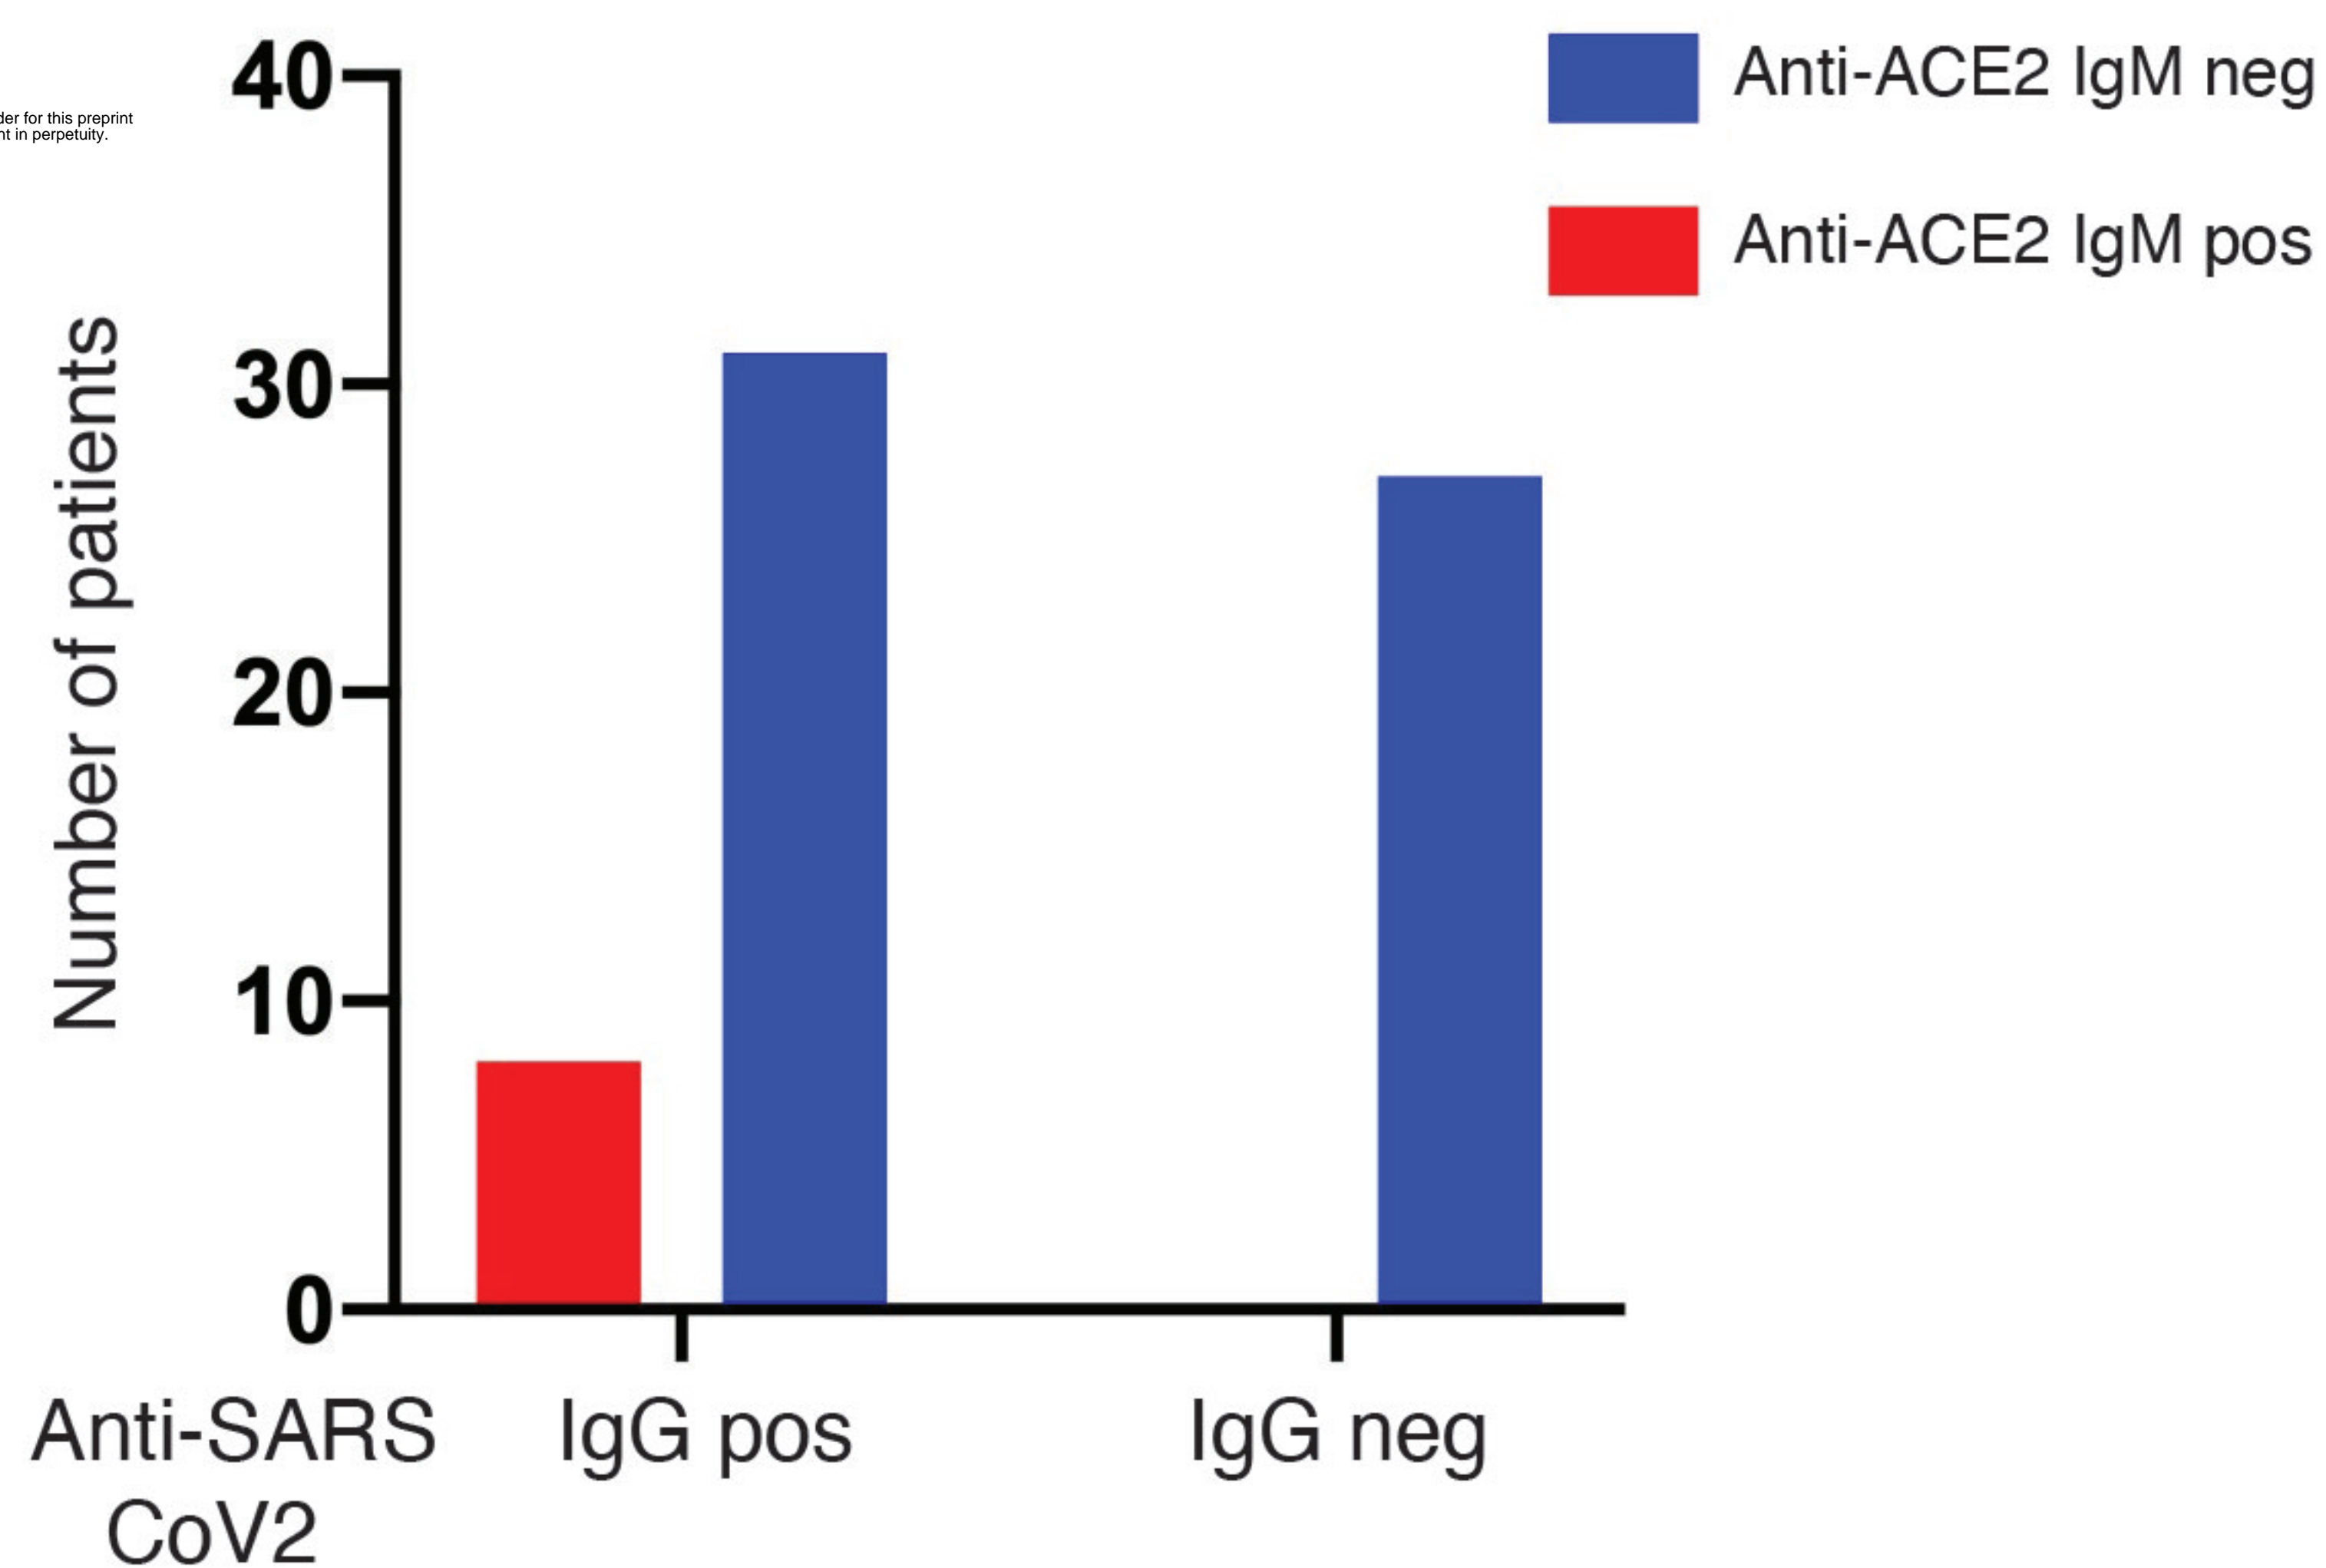

# SUPL FIGURE 5

## A. Kinetic Traces

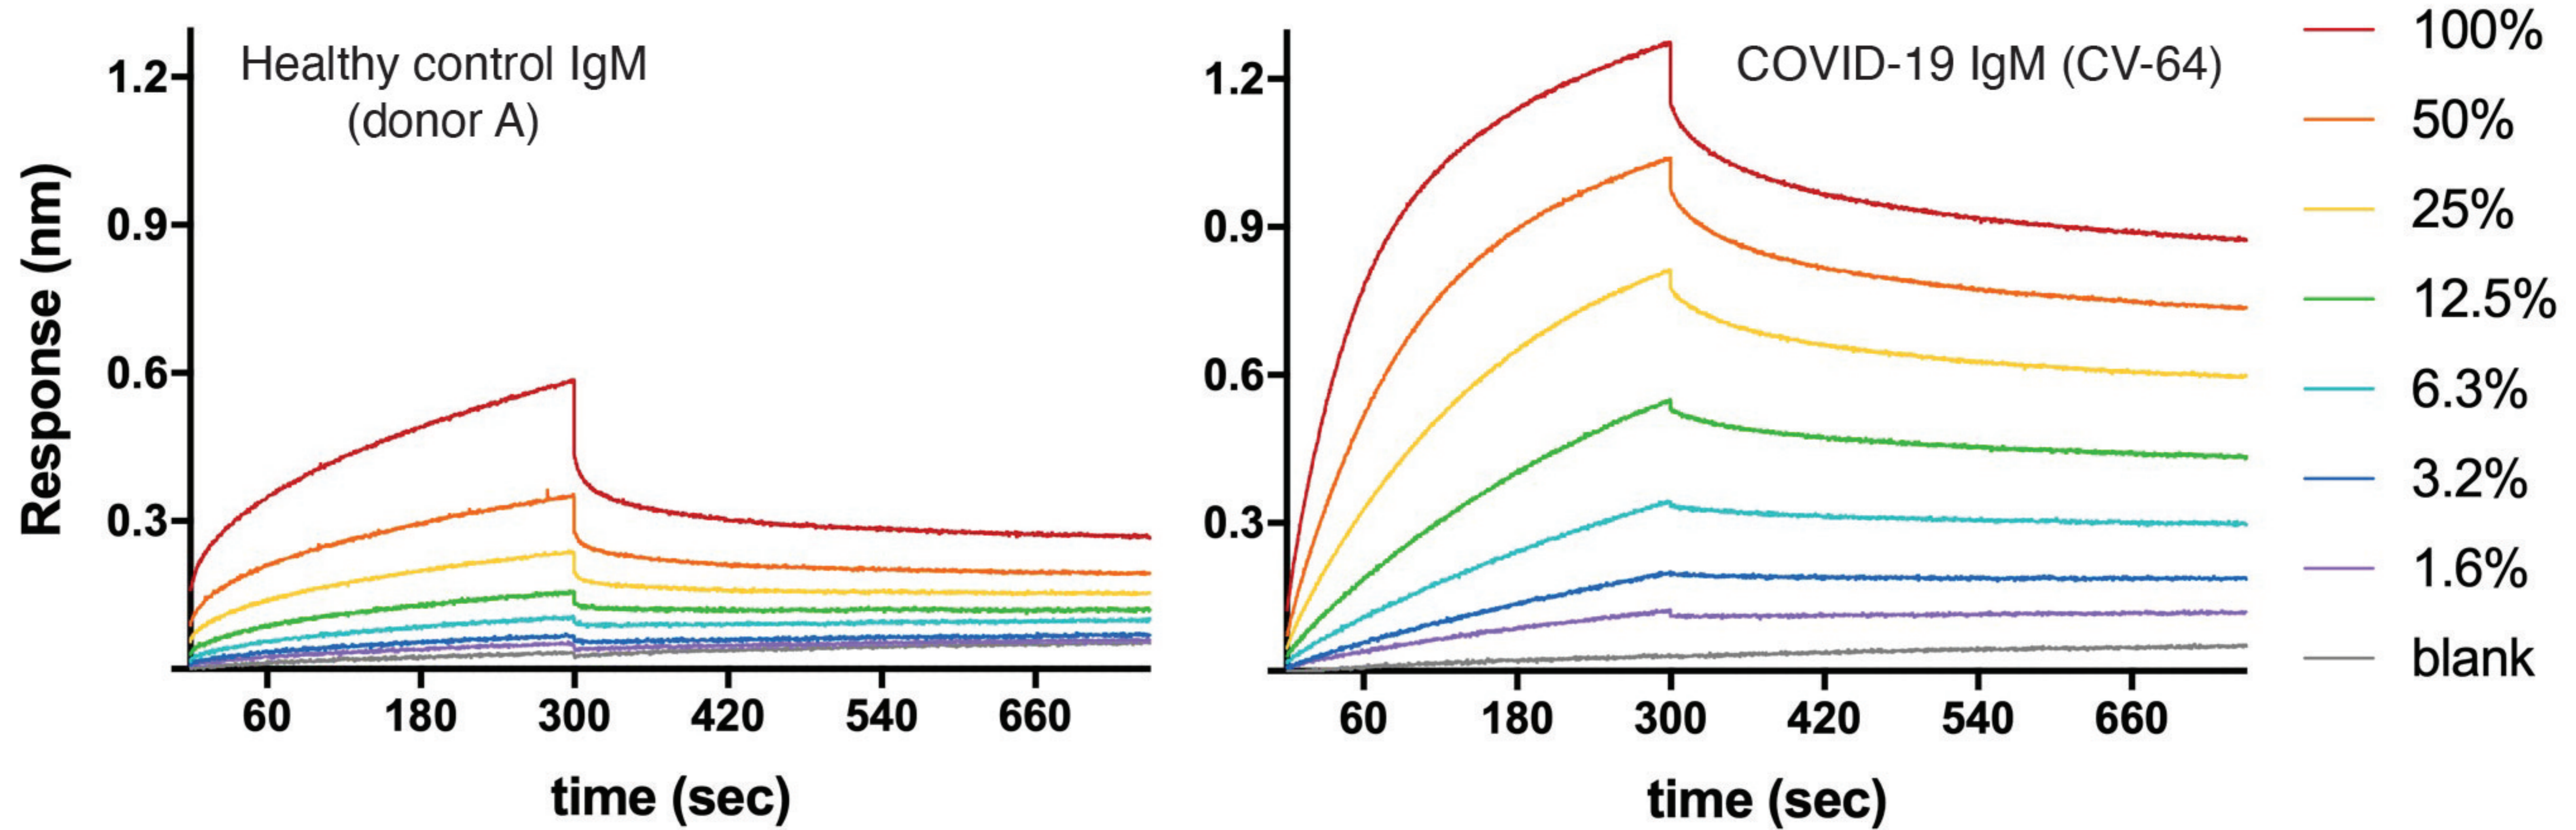

## B. Equilibrium Binding

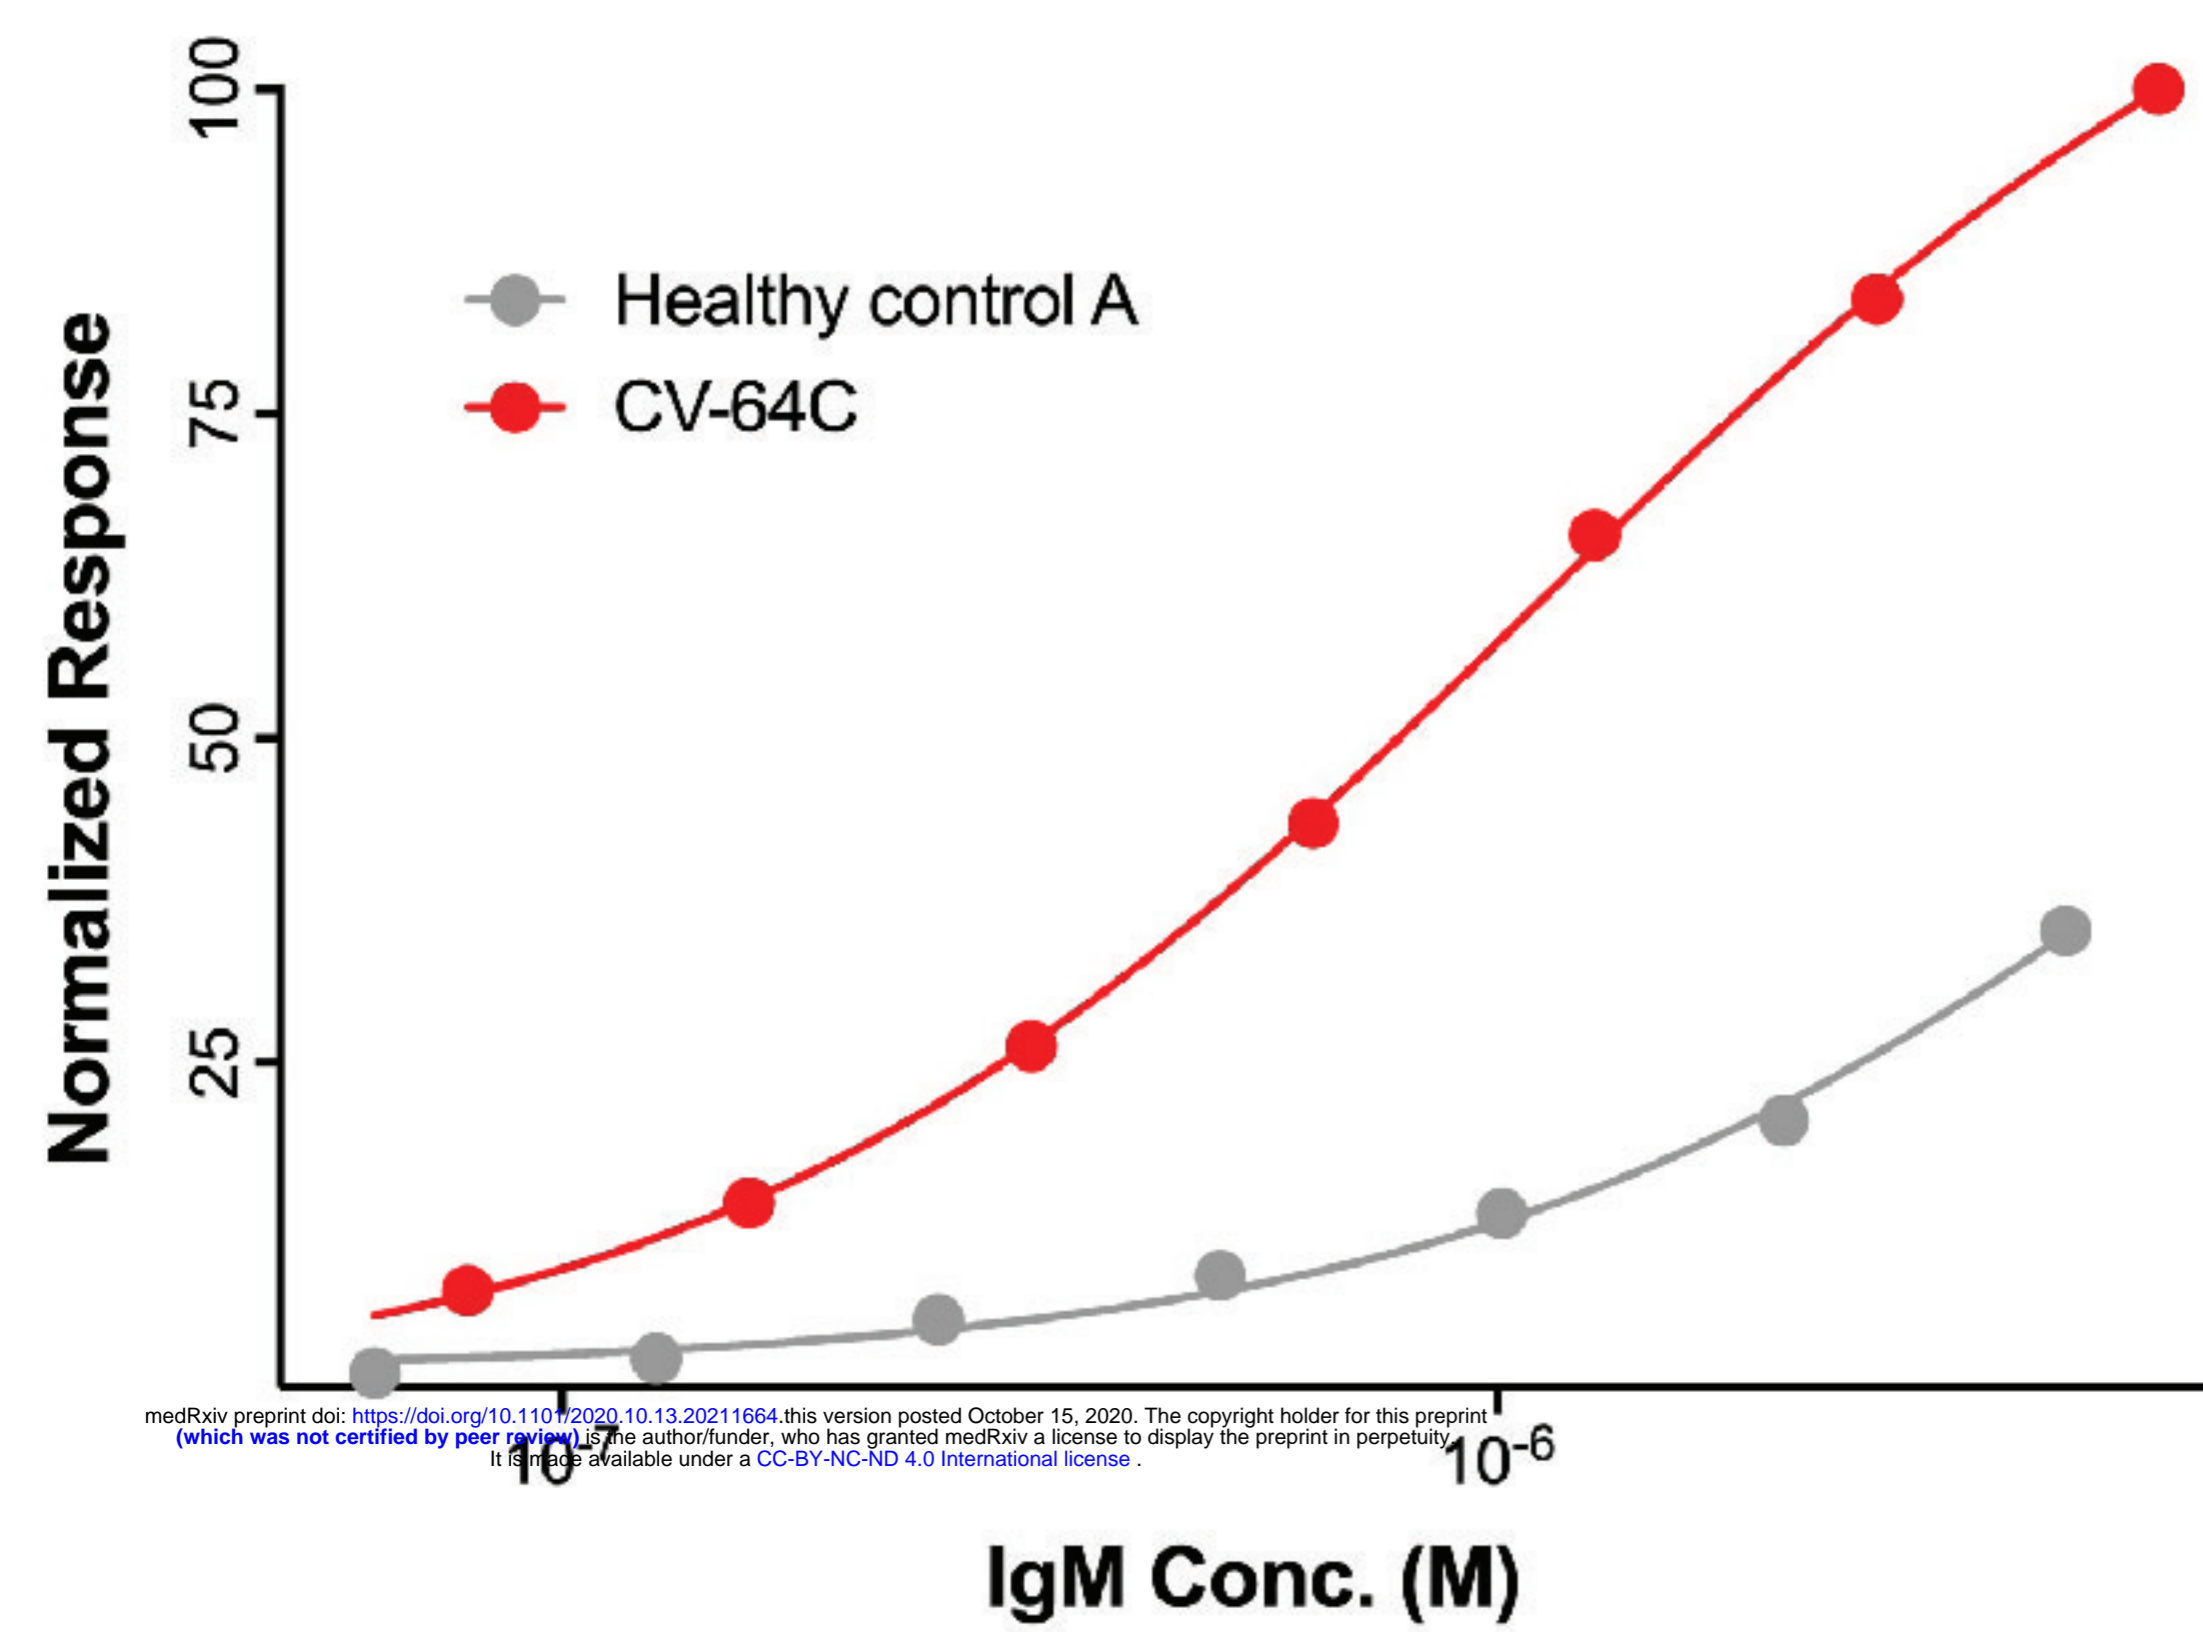

## C. ACE2 activity assay

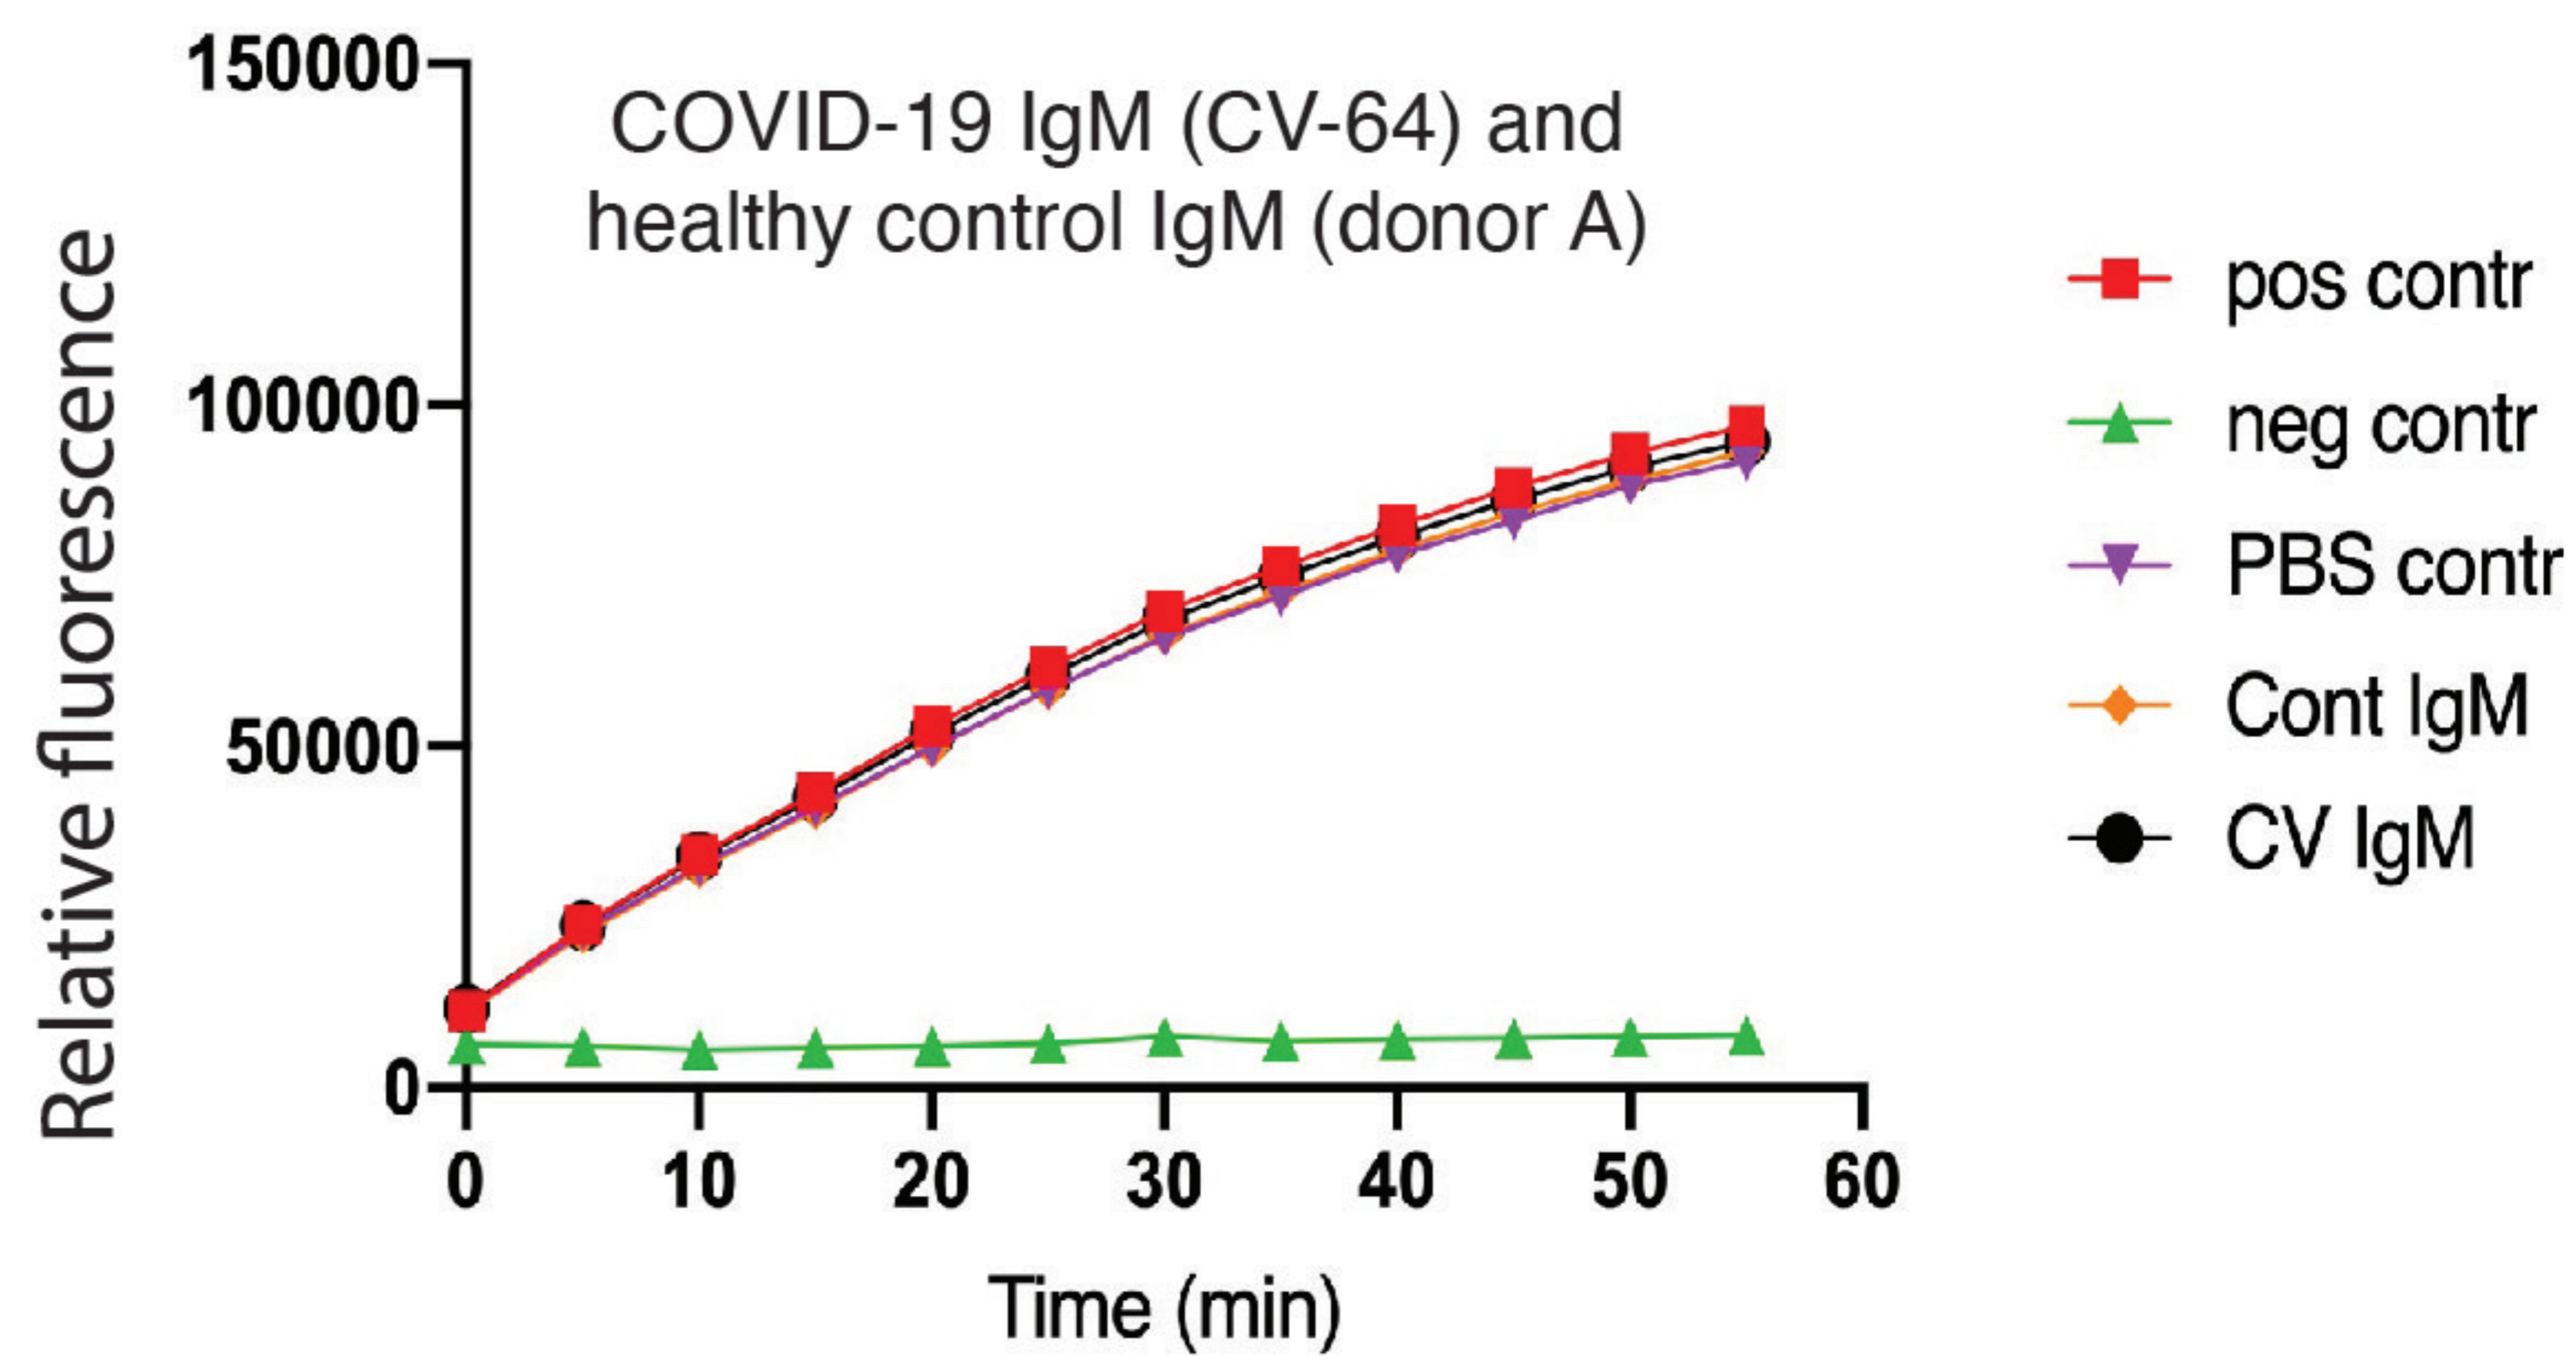

## D. Complement Assay

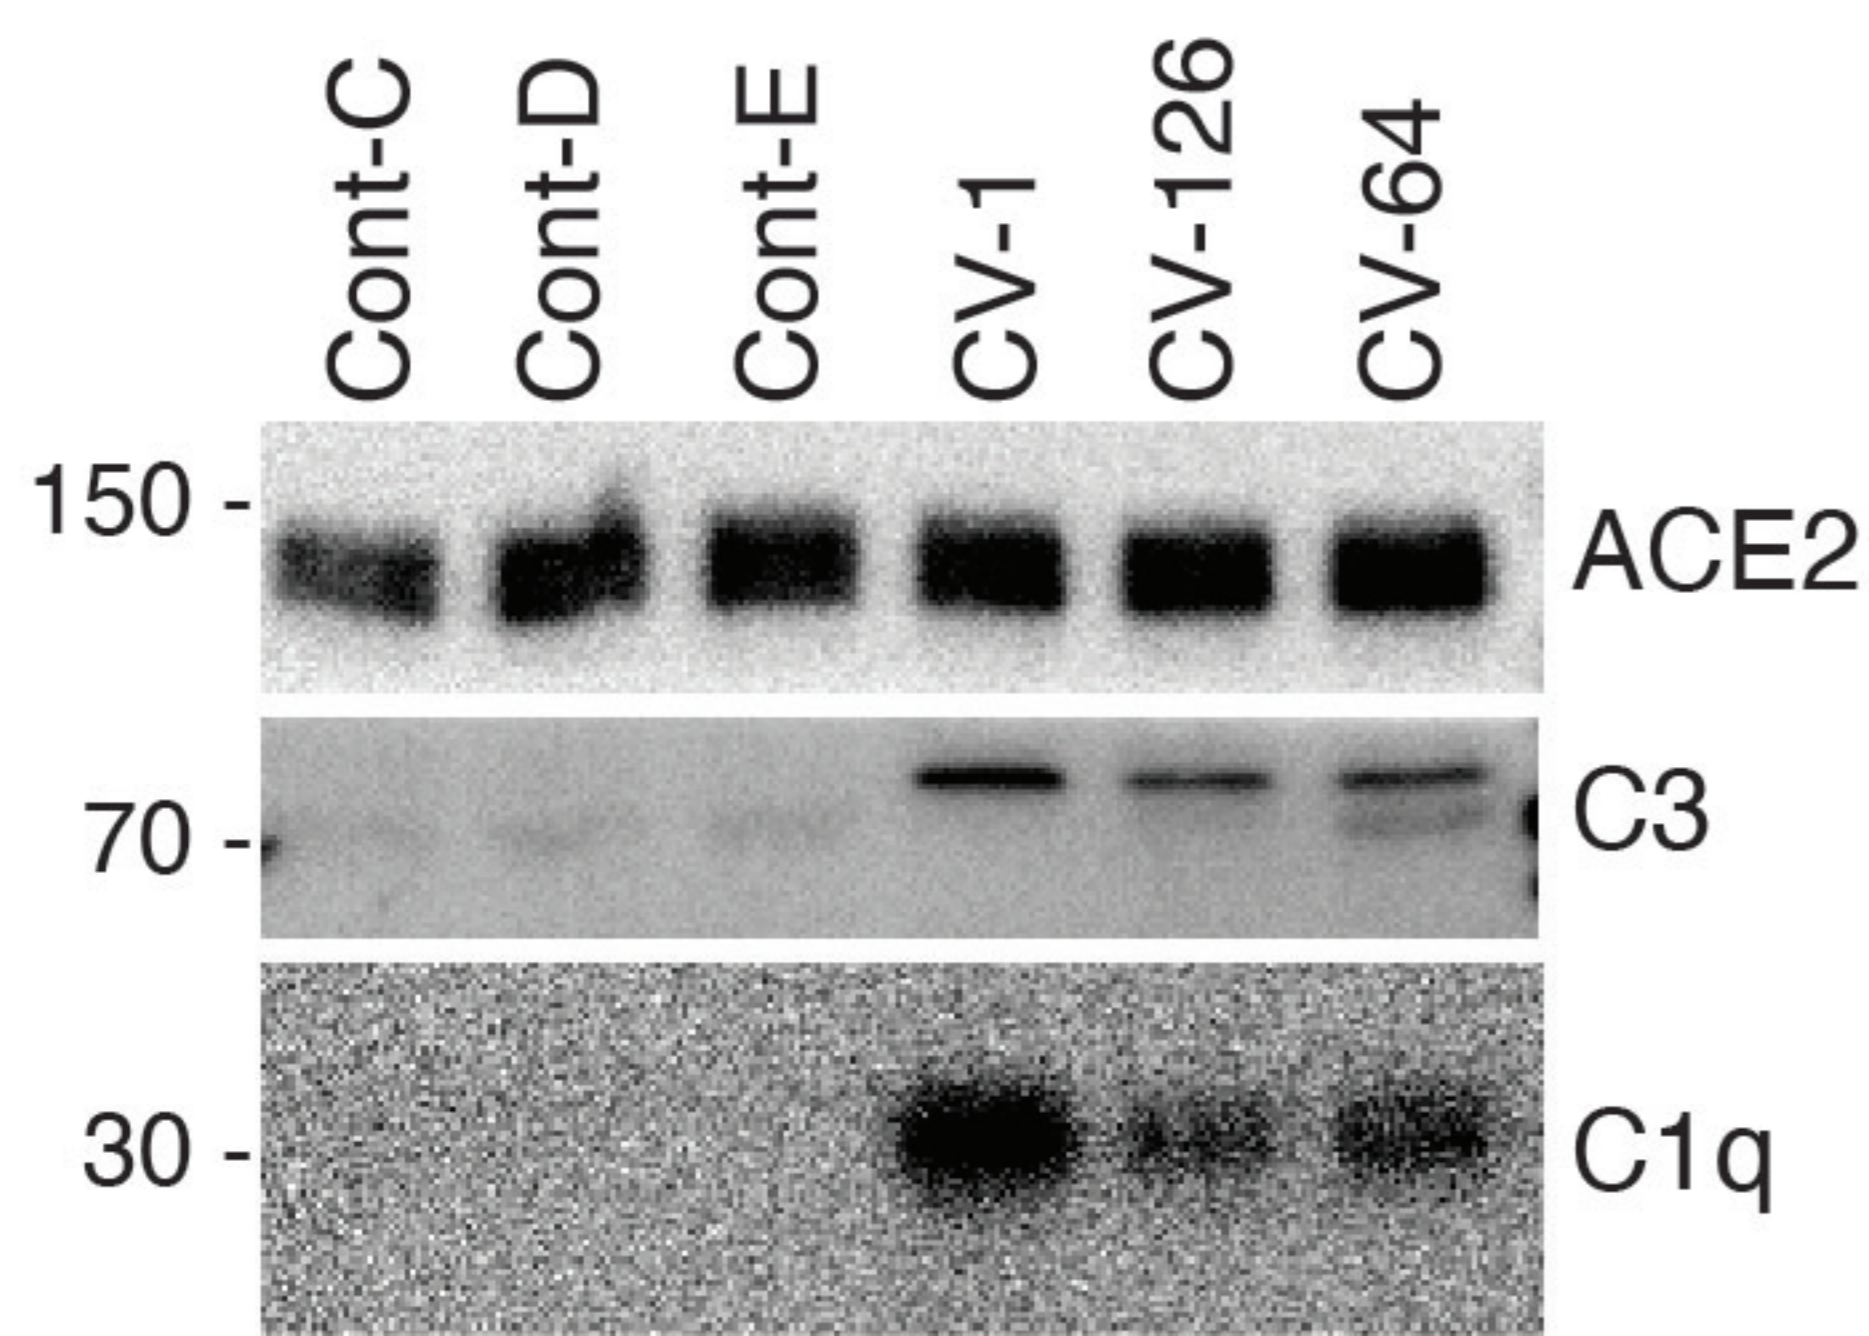

## SUPPLEMENTAL FIGURE LEGENDS

**Supplemental Fig 1: Anti-ACE2 IgM antibodies in COVID-19 patients.** A. Anti-ACE2 IgM ELISAs were performed as described in the Methods section. In the Discovery cohort (left panel), 8/66 patients with COVID-19 were positive for anti-ACE2 IgM antibodies. Of these, 25% of the WHO 6-8 group were positive compared to 2.6% of the WHO 3-5 group ( $p=0.0084$ , Fisher's exact test). An additional 52 COVID-19 patients were assayed ("Expanded discovery", right panel); the frequency of anti-ACE2 IgM in these patients was similar to the initial group. Data from the combined cohorts ( $N = 118$ ) is shown in Fig 1A. B. Anti-ACE2 IgM ELISAs were performed using serial serum dilutions (1:100 to 1:3,200 range). Data obtained from four different patients is shown in the left panel, each assayed using serum from a single bleed. Data from a fifth patient is shown in the right panel, using serum made from blood draws on 4 different days. Area under the curve ("AUC") plots are shown in both panels.

**Supplemental Fig. 2: The higher average body temperature measurements in IgM anti-ACE2 patients are not a function of disease severity.** IgM anti-ACE2-positive group had statistically significantly higher average temperatures over the first 10 days of hospitalization than the IgM-negative group (Fig. 2D). The analysis here is restricted to the severe IgM-positive patients compared to all severe COVID-19 patients from the CROWN Registry for whom IgM status was unknown. The results are unchanged, implicating the increased temperature as a function of IgM status rather than disease severity (IgM-positive: mean = 37.53,  $S^2 = 0.64$ ,  $N = 721$  on  $M = 18$  unique patients, IgM-unknown: mean = 37.11,  $S^2 = 0.59$ ,  $N = 14827$  on  $M = 473$  unique

patients;  $\chi^2 = 19.98$ ,  $p = 0.0005$  from linear mixed-effects model Wald test with 4 degrees of freedom.

### **Supplemental Fig 3: Longitudinal analysis of anti-ACE2 IgM antibodies in patients**

**hospitalized with severe COVID-19.** For all those anti-ACE2 IgM-positive patients with multiple banked sera, anti-ACE2 IgM and IgG antibodies were quantitated over time. Red and blue lines on each plot denote anti-ACE2 IgM and IgG antibodies, respectively. The following patients were on steroid treatment: CV-58 (days 20-24 and 29-36); CV-65 (days 26-28) and CV-129 (day 20 to beyond day 60). Additional examples are shown in Fig. 1B.

### **Supplemental Fig. 4: Antibodies against SARS-CoV-2 S-protein in anti-ACE2-positive COVID-19**

**patients.** A: Anti-SARS-CoV-2 S-protein IgG antibodies were assayed by ELISA (N=66). Patients are shown grouped by disease severity in (left panel), and by anti-ACE2 IgM antibody status in (right panel). The mean ODs of anti-S antibodies were significantly higher in patients with severe compared to mild COVID ( $P < 0.0001$ , Chi-squared). The median anti-S-antibody level was significantly higher in anti-ACE2 IgM-positive patients compared to anti-ACE2 IgM-negatives ( $P = 0.028$ , Mann-Whitney test). B: Anti-S and -RBP antibodies assayed by the CoronaChek point of care assay. 8/8 (100%) of anti-ACE2 IgM-positive patients had a positive IgG result, compared to only 31/58 (53.4%) of anti-ACE2 IgM-negative patients ( $p = 0.017$ , Fisher's exact test). Red and blue denote anti-ACE2 IgM antibody-positive and -negative patients, respectively.



**Supplemental Fig 5: Properties of anti-ACE2 IgM antibodies.** (A-B): Kinetics. A: Kinetic traces of the binding interactions between immobilized human ACE2 and purified IgM, as determined by biolayer interferometry. Percentages represent twofold dilutions of IgM from patient CV-64 and Control A. B: Equilibrium binding titrations. Normalized responses at the indicated concentrations of purified IgM from the donors shown in (A) are plotted (see Fig.3A&B for data obtained from CV-1 and control B). Kinetic parameters are provided in Fig. 3C. C: Anti-ACE2 IgM antibodies do not inhibit ACE2 activity. ACE2 activity, in the presence or absence of IgM from patient CV-64 or Control A, was measured using a fluorescent substrate in a time course assay. The positive control was ACE2 alone, and the negative control was ACE2 plus ACE2 inhibitor (see Fig 3C for data from CV-1 and control B). D: Complement activation induced by IgM antibodies to ACE2. Dynabeads containing immune complexes of ACE2 and purified IgM from controls (cont) or anti-ACE2 IgM from COVID-19 patients (CV) were incubated with human complement. Deposition of C1q and C3 was visualized by immunoblotting. ACE2 is shown as a loading control.
